# 1 **Osteoclast-mediated resorption primes the skeleton for successful** 2 **integration during axolotl limb regeneration**

3

4 Camilo Riquelme-Guzmán<sup>1</sup>, Stephanie L. Tsai<sup>2,3</sup>, Karen Carreon Paz<sup>1</sup>, Congtin Nguyen<sup>1</sup>, David  
5 Oriola<sup>4,5,6,7,\*</sup>, Maritta Schuez<sup>1</sup>, Jan Brugués<sup>4,5,6,7</sup>, Joshua D. Currie<sup>8</sup>, Tatiana Sandoval-Guzmán<sup>1,9,10</sup>

6

7 <sup>1</sup>CRTD/ Center for Regenerative Therapies TU Dresden, Center for Molecular and Cellular  
8 Bioengineering, Technische Universität Dresden, Dresden, Germany.

9 <sup>2</sup>Department of Stem Cell and Regenerative Biology, Harvard University, Cambridge, MA, United  
10 States

11 <sup>3</sup>Center for Regenerative Medicine, Massachusetts General Hospital, Harvard Medical School, Boston,  
12 MA, United States

13 <sup>4</sup>Max Planck Institute of Molecular Cell Biology and Genetics, Dresden, Germany.

14 <sup>5</sup>Max Planck Institute for the Physics of Complex Systems, Dresden, Germany.

15 <sup>6</sup>Center for Systems Biology Dresden, Dresden, Germany.

16 <sup>7</sup>Cluster of Excellence Physics of Life, Technische Universität Dresden, Dresden, Germany.

17 <sup>8</sup>Department of Biology, Wake Forest University, Winston-Salem, NC, USA

18 <sup>9</sup>Department of Internal Medicine 3, Center for Healthy Aging, University Hospital Carl Gustav Carus  
19 at the Technische Universität Dresden, Dresden, Germany.

20 <sup>10</sup>Paul Langerhans Institute Dresden of Helmholtz Centre Munich, at University Clinic Carl Gustav  
21 Carus, TU Dresden Faculty of Medicine, Dresden, Germany.

22 \*Current address: European Molecular Biology Laboratory, EMBL Barcelona, Barcelona, Spain

23

24 Correspondence:

25 Tatiana Sandoval-Guzmán, Department of Internal Medicine 3, Center for Healthy Aging, University  
26 Hospital Carl Gustav Carus at the Technische Universität Dresden, Dresden, Germany.

27 Email: [tatiana.sandoval\\_guzman@tu-dresden.de](mailto:tatiana.sandoval_guzman@tu-dresden.de)

28

## 29 **Keywords**

30 Axolotl, regeneration, skeleton, osteoclasts, integration

31 **ABSTRACT**

32

33 Early events during axolotl limb regeneration include an immune response and the formation of a wound  
34 epithelium. These events are linked to a clearance of damaged tissue prior to blastema formation and  
35 regeneration of the missing structures. Here, we report the resorption of calcified skeletal tissue as an  
36 active, cell-driven and highly regulated event. This process, carried out by osteoclasts, is essential for a  
37 successful integration of the newly formed skeleton. Indeed, the extent of resorption is directly  
38 correlated with the integration efficiency. Moreover, we identified the wound epithelium as a major  
39 regulator of skeletal resorption, likely creating a zone of influence in which signals involved in  
40 recruitment/differentiation of osteoclasts are released. Finally, we reported a correlation between  
41 resorption and blastema formation, particularly, a coordination of resorption with cartilage  
42 condensation. In sum, our results identify resorption as a major event upon amputation, playing a critical  
43 role in the overall process of skeletal regeneration.

## 44 INTRODUCTION

45

46 Urodele amphibians, such as the axolotl (*Ambystoma mexicanum*) are widely considered  
47 prodigies among regenerative vertebrates. The ability to regenerate different body structures, especially  
48 the limb, has driven years of scientific research aiming to understand the mechanisms underlying  
49 regeneration. The axolotl limb is a complex structure, and its regeneration requires an intricate  
50 choreography of all the cellular components. Beyond making new cells of the right type at the right  
51 place, a successful regeneration requires a functional integration of those new cells with the pre-existing  
52 tissue, a process that has not been widely studied. In particular, remains unknown how early processes  
53 impact tissue integration.

54 In general, regeneration progression is marked by different overlapping phases, which lead to  
55 the re-establishment of the missing limb (Sandoval-Guzmán and Currie, 2018). Two of the most critical  
56 events are the formation of the wound epithelium (WE) and the blastema (Aztekin, 2021; Tanaka, 2016).  
57 The WE is formed by migrating keratinocytes which close the wound in just a few hours (Hay and  
58 Fischman, 1961; Repesh and Oberpriller, 1978). Importantly, the WE is characterized by the absence of  
59 a basal lamina, which enhances the diffusion of important factors for regeneration (Neufeld and  
60 Aulhouse, 1986; Repesh and Oberpriller, 1978). Indeed, the WE is a major regulator of the immune  
61 response, tissue histolysis (Tsai et al., 2020), and blastema proliferation and patterning (Boilly and  
62 Albert, 1990; Ghosh et al., 2008; Han et al., 2001). Notably, several works have demonstrated that the  
63 WE is required for blastema formation and thus, regeneration (Mescher, 1976; Tassava and Garling,  
64 1979; Thornton, 1957; Tsai et al., 2020).

65 The blastema is a heterogenous pool of progenitor cells arising from the various tissues at the  
66 amputation plane (Kragl et al., 2009). Among the various limb components, the connective tissue (CT)  
67 is a critical cell source for the blastema, supplying well over 40% of the cells within (Currie et al., 2016;  
68 Dunis and Namenwirth, 1977; Gerber et al., 2018; Muneoka et al., 1986). Limb CT is a conglomerate  
69 of different cell types which are found in tendons, skeleton, dermis and surrounding the skeleton (i.e.  
70 periskeleton), muscle and blood vessels. A particular case is the skeleton, where cells embedded in the  
71 skeletal matrices do not actively participate in regeneration (Currie et al., 2016; McCusker et al., 2016),  
72 instead, dermal and periskeletal cells rebuild the new skeleton (Currie et al., 2016; Dunis and  
73 Namenwirth, 1977; McCusker et al., 2016; Muneoka et al., 1986). Although the skeleton represents  
74 more than 50% of the exposed surface upon amputation (Hutchison et al., 2007), it is unclear the role  
75 the embedded cells play in the remodeling and integration of new tissue.

76 Undoubtedly, the skeletal system is essential for the limb, serving as a physical scaffold and  
77 allowing locomotion. In mammals, the appendicular skeleton develops by endochondral ossification, a  
78 process where a cartilage anlage is replaced by bone (Kozhemyakina et al., 2015). In axolotls, we  
79 showed that the limb skeleton is progressively ossified with growth and age (Riquelme-Guzmán et al.,  
80 2021), but retains a cartilage anlage even in the oldest specimen analyzed. Juvenile axolotls present a

81 cartilaginous skeleton composed of chondrocytes and perichondral cells. Around the time animals reach  
82 sexual maturity, the cartilaginous skeleton is partly replaced by bone cells, adipocytes, and blood vessels  
83 during ossification. Key players in this process are osteoclasts, a myeloid-derived population, which  
84 mediates the degradation of the cartilage matrix prior to bone formation.

85 Osteoclasts are giant multinucleated cells with a specialized morphology adapted for skeletal  
86 resorption (Cappariello et al., 2014). Besides their role in homeostasis, osteoclasts are recruited upon  
87 bone injuries or trauma. The most studied case is fracture healing (Einhorn and Gerstenfeld, 2015);  
88 however, in the context of regeneration, osteoclasts are recruited after fin amputation in zebrafish (Blum  
89 and Begemann, 2015), and digit tip amputation in mouse (Fernando et al., 2011). In urodeles, evidence  
90 of osteoclast-mediated resorption is scarce (Fischman and Hay, 1962; Tank et al., 1976). Nevertheless,  
91 the presence of myeloid cells triggered by the amputation has been reported (Debuque et al., 2021; Leigh  
92 et al., 2018; Rodgers et al., 2020), and the participation of macrophages was shown to be critical. When  
93 macrophages were ablated, a complete halt in regeneration was reported (Godwin et al., 2013). Similar  
94 results were observed upon mouse digit tip amputation, and a specific osteoclast inhibition resulted in  
95 delayed bone resorption, wound closure and blastema formation; however, regeneration proceeded  
96 (Simkin et al., 2017).

97 Immune cells play an important role in histolysis, which involves the degradation of the  
98 extracellular matrix (ECM) in the vicinity of the amputation plane (Stocum, 2017), helping the  
99 mobilization of progenitor cells (Thornton, 1938a, 1938b). Histolysis is characterized by the release of  
100 proteolytic enzymes, essential for an efficient regeneration (Huang et al., 2021; Vinarsky et al., 2005;  
101 Yang et al., 1999; Yang and Byant, 1994). Histolysis is additionally controlled by the WE (Vinarsky et  
102 al., 2005), as shown by a major down-regulation of degrading enzymes upon the inhibition of WE  
103 formation (Tsai et al., 2020). Similarly, macrophage ablation resulted in a down-regulation of matrix  
104 metalloproteinases (MMPs) (Godwin et al., 2013).

105 Successful limb regeneration is achieved by a complete amalgamation of the regenerated  
106 structures with the mature tissues, or tissue integration. Although the regenerated limb is often  
107 considered a perfect replica of the pre-existing limb, in the last decade the fidelity of limb regeneration  
108 has been addressed by a couple of works. For instance, abnormalities due to conspecific bites were  
109 observed in 80% of larvae and 50% of adults (Thompson et al., 2014), or anomalies in over 50% of the  
110 amputated animals, such as fractures at the level of amputation or constrictions of the skeletal elements  
111 (Bothe et al., 2020). However, it is still unknown why such phenotypes are observed, and what entails  
112 successful versus unsuccessful regeneration. In this regard, regeneration-specific signals in the stump  
113 tissue could prime the limb and promote a successful integration of the newly formed structures. Indeed,  
114 in the newt *Cynops pyrrhogaster*, structural changes in the ECM of the distal humerus can be observed  
115 after an elbow joint amputation, demonstrating a correlation between ECM remodeling and proper joint  
116 regeneration as well as integration to the mature tissue (Tsutsumi et al., 2015).

117           With all the aforementioned evidence, we sought to assess the significance of skeletal histolysis  
118 for regeneration. We observed a rapid skeletal resorption which is carried out by osteoclasts, and we  
119 provide evidence that this process is essential for tissue integration. Moreover, we propose a role for the  
120 WE in resorption induction and a spatiotemporal coordination between resorption and blastema  
121 formation. Overall, our work provides an in-depth assessment of how a remodeling process influences  
122 the final outcome of regeneration using the axolotl limb.

## 123 RESULTS

124

### 125 Skeletal elements are resorbed upon amputation

126 To determine the changes in the skeleton upon amputation, we used the stable calcium-binding  
127 dyes calcein and alizarin red. These dyes label mineralized cartilage in juvenile axolotls, allowing *in*  
128 *vivo* imaging (Riquelme-Guzmán et al., 2021). Using 4-6 cm ST (snout-to-tail) axolotls, we amputated  
129 the zeugopod at the distal end of the calcified tissue and imaged at different days post amputation (dpa)  
130 (Fig. 1A). We observed a consistent reduction in the calcein<sup>+</sup> tissue from 7 until 12 dpa. We quantified  
131 the length of the calcified tissue in both zeugopodial elements and compared them to the initial length  
132 at day 0 (Fig. 1B). Resorption initiated after 7 dpa and by 12 dpa, over 40% of the calcified radius and  
133 60% of the calcified ulna were resorbed (length resorbed radius:  $342.83 \pm 95.75 \mu\text{m}$ ; ulna:  $770.67 \pm$   
134  $94.34 \mu\text{m}$ ). We pooled five independent experiments and noticed an important variability between  
135 assays (Fig. 1C, each color represents an assay). The median for radius resorption is 40% and for ulna  
136 60%; however, in several cases the calcified tissue was completely resorbed in both elements. Although  
137 an inter-assay variability was observed, intra-assay animals presented a consistent resorption ratio.

138 Digits are a simplified platform to perform *in vivo* imaging, therefore we assessed resorption by  
139 amputating the distal end of the calcein<sup>+</sup> tissue in the distal phalanx of the second digit (Fig. 1D). Similar  
140 to the zeugopod, we quantified the calcein<sup>+</sup> tissue length at different dpa and revealed a similar trend in  
141 the resorptive dynamics: resorption starting after 7 dpa and receding by 13 dpa (Fig. 1E), vanishing over  
142 50% of the calcified tissue length ( $320.43 \pm 113.56 \mu\text{m}$ ). In sum, we report resorption to be a process  
143 that occurs upon amputation of different calcified skeletal elements in the axolotl limb.

144 Finally, we collected limbs at 9 and 15 dpa and stained them with alcian blue (Fig. 1F). At 9  
145 dpa, we observed resorption in both radius and ulna. Remarkably, we occasionally observed a break in  
146 the ulna (Fig. 1F arrowhead) that sometimes led to the extrusion of the skeletal fragment through the  
147 epidermis. This skeletal shedding was observed both in digit and limb amputations. At 15 dpa, resorption  
148 was finished and the condensation of the new skeleton could be observed.

149

### 150 Osteoclasts are identified during skeletal resorption

151 Osteoclasts are specialized multinucleated cells responsible for skeletal resorption (Charles and  
152 Aliprantis, 2014). Despite their critical role in skeletal biology, osteoclasts in salamander regeneration  
153 have only been reported on the basis of morphology during salamander regeneration (Fischman and  
154 Hay, 1962; Nguyen et al., 2017; Tank et al., 1976). Therefore, we sought to identify osteoclasts during  
155 resorption using various molecular markers.

156 Several enzymes, such as cathepsin K (CTSK) and the tartrate-resistant acid phosphatase  
157 (TRAP) (Cappariello et al., 2014), are released by osteoclasts and are used as identifying markers. Using  
158 sections from zeugopodial amputations, we performed immunofluorescence using an anti-CTSK  
159 antibody (Fig. 2A) and TRAP enzymatic staining (Fig. 2B). CTSK<sup>+</sup> cells were identified in sections at

160 8 dpa adjacent or inside the calcein<sup>+</sup> skeleton. Similarly, TRAP<sup>+</sup> cells were identified at 9 dpa. Next, to  
161 correlate osteoclast recruitment with resorption timing, we performed RT-qPCR at different dpa using  
162 specific primers for *Trap*, *Ctsk* and *Dcstamp* (dendritic cell-specific transmembrane protein, involved  
163 in osteoclast multinucleation). The RNA relative content for the three markers behaved similarly: a  
164 sharp increase was observed, reaching a peak at 9 dpa before rapidly decrease to almost basal levels at  
165 15 dpa (Fig. 2C).

166 To assess osteoclast spatiotemporal dynamics *in vivo*, we developed a *Ctsk:mRuby3* and  
167 *Ctsk:eGFP* transgenic lines, which express the fluorescent protein *mRuby3* or *eGFP* under the control  
168 of *Ctsk* promoter from zebrafish. Using *Ctsk:mRuby3* animals, we followed resorption in digits with  
169 confocal microscopy (Fig. 2D). At 0 dpa, the tissue was devoid of mRuby3<sup>+</sup> cells. At 9 dpa,  
170 mononuclear-like cells were observed in the periphery of the calcified phalanx. These cells increased in  
171 numbers and size at 11 dpa (white arrowheads). A break in the phalanx (black arrowhead) was seen at  
172 this timepoint. At 13 dpa, most of the phalanx was resorbed and mRuby3<sup>+</sup> cells were scattered  
173 throughout the sample. A giant multinucleated cell was observed next to the calcified tissue (asterisk  
174 Fig. 2D). Finally, between 13 and 15 dpa, resorption was completed and mRuby3<sup>+</sup> cells vacated the  
175 space, some showing signs of apoptotic puncta. Although most osteoclasts were multinucleated, we also  
176 observed mononuclear cells. Whether this indicates differences in osteoclast biology between axolotls  
177 and other model organisms, is not yet determined. Nevertheless, by utilizing different approaches, we  
178 demonstrated the presence and participation of osteoclasts in the regeneration-induced resorption.

179

### 180 **Zoledronic acid treatment inhibits osteoclast-mediated skeletal resorption**

181 To assess the effect of osteoclast inhibition on regeneration, we treated animals with the  
182 osteoclast inhibitor zoledronic acid (zol). Zol is a potent bisphosphonate, used in the treatment of  
183 osteoporosis. It is internalized by osteoclasts, preventing protein prenylation and consequently their  
184 intracellular localization and function (Dhillon, 2016), which could lead to apoptosis (Cléardin, 2013).  
185 By serial intraperitoneal injections of 200 µg/kg of zol every 3 days, we evaluated the effect of osteoclast  
186 inhibition by imaging the length of the skeletal elements at different dpa. Zol treatment inhibited  
187 resorption as seen at 12 dpa (Fig. 3A), since most of the calcified tissue remained intact when compared  
188 to the untreated control and vehicle. Quantification of both radius and ulna lengths at different dpa  
189 revealed a significant difference between the radius or ulna in zol-treated animals compared to the  
190 controls at 11, 12 and 15 dpa (Fig. 3B).

191 Furthermore, we measured the relative RNA content of *Ctsk*, *Trap* and *Dcstamp* at 9 dpa in each  
192 condition. No significant difference was observed for the three markers (Fig. 3C), although the mean  
193 for zol-treated samples was smaller in each case. Our results suggested that zol treatment mainly results  
194 in a consistent inhibition of osteoclast function. Consequently, we performed *in vivo* imaging of digit  
195 regeneration upon zol treatment in the *Ctsk:eGFP* transgenic line. When resorption was inhibited by zol  
196 treatment, we observed a reduction in the number of eGFP<sup>+</sup> cells (Fig. 3D). Although present, these cells

197 did not seem to resorb the calcified tissue. Therefore, zol treatment inhibits osteoclast-mediated  
198 resorption, but it does not result in their complete ablation.

199

## 200 **Skeletal resorption is necessary for a successful integration of the regenerated structure**

201 To assess the importance of resorption, we followed the zol-treated animals until 45 dpa. At this  
202 stage, limbs are fully formed but they have not reached yet full size (Tank et al., 1976). Looking at the  
203 gross morphology, resorption inhibition did not halt regeneration, as zol-treated animals were able to  
204 form a new limb. We assessed integration by sequentially staining with calcium binding dyes of different  
205 color, we distinguished the original calcification (calcein<sup>+</sup>) from the calcification of regenerated skeletal  
206 elements (alizarin red<sup>+</sup>) (Fig. 4A, left panel). In contralateral limbs, alizarin red staining showed new  
207 calcification from the calcein staining at 0 dpa. Comparatively, we observed no calcein<sup>+</sup> tissue in the  
208 untreated animals, indicating a full resorption of the calcified tissue in the radius and ulna. The alizarin  
209 red<sup>+</sup> region demonstrated regeneration of the skeleton. In zol-treated animals, at least half of the calcified  
210 region was calcein<sup>+</sup>/alizarin red<sup>+</sup>, confirming resorption inhibition. Interestingly, we observed a faulty  
211 morphology in the radius from the zol-treated animal (arrowhead Fig. 4A, left panel). To gain a better  
212 insight into the morphology of the regenerated zeugopod, we collected those limbs and stained them  
213 with alcian blue (Fig. 4A, right panel). The zol-treated limb showed a clear failure in the integration of  
214 the newly formed cartilage, especially in the radius. The new tissue lacked a seamless connection to the  
215 stump part, presenting an angulated morphology (black arrowhead). In the ulna, heterotopic cartilage  
216 formation was seen (asterisk). Surprisingly, the skeletal elements of untreated regenerating animals also  
217 showed imperfect morphology, even though the calcified areas were fully resorbed. Both radius and  
218 ulna were restored as one complete unit, but with an irregular interphase between the stump and  
219 regenerated part, observed as a narrowing in the mid-diaphysis (black arrowhead, Fig. 4A).

220 Among the control and zol-treated limbs, we found different rates of resorption (Fig. 4B). A  
221 correlation between resorption rate and integration efficiency could be observed, particularly for the  
222 radius. In a zol-treated animal, with null resorption in the radius (R:0), the distal end of the stump part  
223 and the proximal end of the regenerated skeleton failed to meet. The regenerated skeleton formed at an  
224 adjacent plane, therefore lacking continuity with the pre-existing skeleton. Moreover, a second  
225 condensation zone was seen, as cartilage also formed distal to the un-resorbed tissue.

226 To consistently quantify the integration success, we analyzed only animals undergoing normal,  
227 undisturbed regeneration. This way, with less severe phenotypes and the skeletal elements regenerating  
228 as one unit, it was simpler to correlate resorption to integration. The angle of the regenerated skeletal  
229 elements to the stump skeletal element was measured. In 18/22 untreated animals, their radii were not  
230 fully resorbed and presented different degrees of angulation, between 135° to 165°, at the stump-  
231 regenerated interphase (Fig. 4C). These results show that even in the best-case scenario, limb  
232 regeneration in the axolotl can lead to an imperfect outcome.



233 We assessed whether the faulty integration was resolved at later stages. We collected limbs at  
234 90 dpa and stained them with alcian blue/alizarin red. In 6/6 limbs screened, in which the resorption rate  
235 was over 50% for both elements, we could still observe a faulty integration of both radius and ulna  
236 (arrowheads, Fig. 4D). This imperfect integration was identified by an angulation at the stump-  
237 regenerated interphase, similar to what we reported at 45 dpa.

238 As resorption has a clear impact on skeletal integration during regeneration, we sought to  
239 analyze the ECM organization and its changes at the stump-regenerated interphase using quantitative  
240 polarization microscopy (LC-PolScope) (Oldenbourg, 1996). We used limb sections from normally  
241 regenerated animals for our analysis. By looking at the ECM organization (retardance image), we  
242 observed a clear difference in the hypertrophic zone (HZ) of regenerated ulnas when compared to the  
243 contralateral limb (arrowhead, Fig. 4E). We believe that this region in the HZ corresponded to the stump-  
244 regenerated interphase. Next, using the retardance image, we created a digital mask that allowed us to  
245 quantify the orientation of the ECM components using the slow axis orientation image (Fig. 4E, lower  
246 panels). We defined two regions, the HZ, where the interphase is found, and the resting zone (RZ), a  
247 control region proximal to the amputation plane. We generated a histogram representing the angle  
248 distribution in each zone. We observed that the HZ in the contralateral ulnas presented a parallel  
249 organization of the ECM respect to the proximo-distal axis, while the regenerated presented a shift in  
250 the organization, with the ECM fibers arranged perpendicularly. The RZ remained unchanged in both  
251 samples sets (Fig. 4F). This result shows that the regenerated ECM does not recapitulate the original  
252 structure, and supports the idea that skeletal regeneration is not completely efficient in the axolotl.

253 Altogether, these results show the importance of resorption during skeletal regeneration and  
254 requirement for integration of the regenerated tissue. However, these results also highlight that even in  
255 normal conditions, the regenerated skeleton does not recapitulate the smooth structure seen pre-  
256 amputation.

257

### 258 **The wound epithelium is involved in resorption induction**

259 A previous report showed that the WE is critical for inflammation and tissue histolysis (Tsai et  
260 al., 2020). When the WE formation was prevented by mechanically closing the wound with stump tissue,  
261 in a so-called full skin flap surgery (FSF), *Ctsk* expression was absent at 5 dpa compared to control.  
262 This suggests potential defects in skeletal resorption and a role of the WE in its induction. Therefore,  
263 we sought to evaluate the role of the WE in skeletal resorption.

264 Given the technical difficulty of this surgical procedure, we used 14 cm ST animals, similar to  
265 the previous reported model (Tsai et al., 2020). We amputated the limbs prior to FSF surgery, and  
266 followed them until 15 dpa. Using *in vivo* imaging, we observed an inhibition in resorption in FSF  
267 samples by comparing calcified tissue length to the control limb (arrowhead Fig. 5A). Next, we collected  
268 the limbs and performed alcian blue/alizarin red staining. In 7 out 9 control samples, we observed a clear  
269 degradation in the distal end of the skeletal elements (black arrowhead Fig. 5B), while no or limited

270 resorption was observed in the FSF limbs. To further confirm resorption inhibition, we collected limbs  
271 at 9 dpa and performed ISH for *Ctsk*. We saw a significant reduction of the *Ctsk* staining in FSF sections  
272 (Fig. 5C), suggesting the WE plays a role in the recruitment or differentiation of osteoclasts.

273 By using 14 cm ST animals, we demonstrate that resorption occurs also when skeletal elements  
274 in the limb are undergoing ossification. Limbs of older animals are opaquer and becomes harder to  
275 quantify the length of the calcified tissue, thus, we performed micro-CT scans in limbs of animals 16  
276 cm ST (Fig. supplement 1). We confirmed a significant resorption of ossified elements in a slightly  
277 extended, but conserved time window than in small animals.

278 To evaluate whether the WE position might determine the region of resorption initiation, we  
279 spatially correlated resorption and the WE. We performed WISH for *Krt17*, which labels cells in the  
280 basal layers of the WE (Leigh et al., 2018). We observed a clear labelling of the WE from 1 to 7 dpa  
281 (Fig. 5D). At 1 and 5 dpa, we observed that at least 1/3 of the skeletal elements (yellow dashed lines)  
282 were covered by the WE, which could account for over 50% of the tissue that will be resorbed.  
283 Morphologically, the WE is characterized by the absence of a basal lamina (Neufeld and Aulhouse,  
284 1986; Repesh and Oberpriller, 1978; Tsai et al., 2020), hence we used this feature to correlate the WE  
285 and resorption. We collected and sectioned limbs at 1, 5 and 7 dpa, and performed Masson's trichrome  
286 staining. The lack of a basal lamina was observed by the absence of collagen staining in blue (yellow  
287 arrowheads, Fig. 5E). Osteoclasts could be identified by their multiple nuclei and morphology. As  
288 expected, we did not observe any osteoclast at 1 dpa. At 5 dpa, we identified the first infiltration of the  
289 skeletal elements, albeit a small number of osteoclasts (white arrowheads, Fig. 5E, F). Finally, we saw  
290 pronounced infiltration at 7 dpa, including the presence of osteoclasts (white arrowheads, Fig. 5E, G).  
291 Notably, most of these cells were located in the proximity of the WE. To evaluate the location of the  
292 osteoclasts, we defined a region by drawing a line between the edges of the WE in the sections stained  
293 and we mapped the position of each osteoclast at 7 dpa (Fig. 5H). Most of the osteoclasts were located  
294 in the region covered by the WE, i.e. in the distal part of the skeletal elements. In the more proximal  
295 regions of the zeugopod, we did not observe any osteoclasts.

296 In sum, our data suggest that the WE plays a role in both osteoclasts recruitment and/or  
297 differentiation, as well as in generating a zone of influence which determines resorption initiation in the  
298 distal regions of the skeletal elements.

299

### 300 **Identification of candidates involved in osteoclast recruitment and/or differentiation**

301 To identify possible candidates involved in osteoclast recruitment and/or differentiation, we  
302 curated a published RNA-seq dataset in which FSF surgery was performed (Tsai et al., 2020). In that  
303 work, three different populations from blastemas at 5 dpa were isolated: dividing cells (4N), non-  
304 dividing cells (2N) and epithelial cells (EP). We first checked which fraction was enriched for transcripts  
305 associated with osteoclast function at 5 dpa. As expected, non-dividing cells (2N) were enriched for  
306 osteoclasts genes (*Trap*, *Traf6*, *Rank*, *Ocstp*, *Nfatc1*, *Dcstamp*, *Ctsk*, *Csfr1*) (Fig. 6A). Moreover, in the

307 2N fraction at 5 dpa, most of those transcripts were up-regulated compared to day 0, and down-regulated  
308 in FSF limbs at 5 dpa (Fig. 6B). This analysis supports our previous results, in which we observed an  
309 inhibition of resorption when the WE formation was prevented.

310 Next, we evaluated which transcripts were significantly down-regulated in the EP fraction of  
311 FSF limbs compared to a control limb at 5 dpa (supplementary information Tsai et al., 2020). We found  
312 several transcripts associated with osteoclast recruitment and/or differentiation (Fig. 6C). From these  
313 candidates, previous work reports a role for *Ccl4* (Xuan et al., 2017), *Sphk1* (Baker et al., 2010; Ishii et  
314 al., 2009; Ryu et al., 2006) and *Mdka* (Maruyama et al., 2004) in osteoclastogenesis. Moreover, these  
315 three transcripts were up-regulated at 5 dpa compared to 0 dpa, suggesting their participation in  
316 regeneration (red arrows, Fig. 6C). Finally, we confirmed that most of the candidate transcripts shown  
317 in Fig. 6C were expressed in the EP fraction (Fig. 6D), including *Sphk1* and *Ccl4*. One of the exceptions  
318 was *Mdka*, whose levels were more prominent in the 4N fraction; however, it was recently shown that  
319 *Mdka* plays a critical role in WE development and inflammation control during the earlier stages of  
320 regeneration (Tsai et al., 2020). This analysis provides evidence that factors associated with  
321 osteoclastogenesis and osteoclast recruitment, normally produced by the WE, are down regulated when  
322 WE formation is inhibited. Correspondingly, osteoclast transcripts are down-regulated in blastema cells.

323

#### 324 **Skeletal resorption and blastema formation are spatially and temporally correlated**

325 Blastema formation is considered an accumulation of cells at the amputation plane. However,  
326 taking resorption into consideration, those cells are initially accumulating (or reprogramming) more  
327 proximal to the amputation plane. Here, we showed that resorption can reach up to 100% of the calcified  
328 tissue, and hence the accumulation of progenitor cells might occur up to 1 mm behind the amputation  
329 plane. With this in mind, we sought to assess the blastema specification in the context of skeletal  
330 resorption.

331 First, we measured the blastema surface in images taken at 15 dpa, when resorption is completed  
332 and blastema already formed in zol-treated animals. We considered the distal end of the skeletal  
333 elements as the starting point of blastema, as it was proposed that progenitor cells accumulate distal to  
334 the end of the skeleton (Tank et al., 1976). As shown in Fig. 7A, we found a significant decrease in  
335 blastema area in zol-treated animals (yellow dashed line). To efficiently analyze the blastema position  
336 during resorption, we used molecular markers. First, we performed whole mount EdU staining at  
337 different dpa (Fig. 7B). Similar to previous reports, in an intact limb, EdU<sup>+</sup> cells are less than 0.5% of  
338 the total cells (Johnson et al., 2018). At 7 dpa, we observed EdU<sup>+</sup> cells behind the amputation plane,  
339 spanning over more than 500  $\mu$ m. These cells were located where we expected to observe resorption.  
340 Interestingly, several EdU<sup>+</sup> cells were located in the periskeleton (arrowheads), which could account for  
341 cells contributing to skeletal regeneration (Currie et al., 2016; McCusker et al., 2016). These cells were  
342 found along most of the skeletal element length. At 10 dpa, when resorption is occurring, we observed  
343 a more defined blastema (white arrowhead), which contained EdU<sup>+</sup> cells. Similar to 7 dpa, a significant

344 proportion of those EdU<sup>+</sup> cells were located next to the resorbing skeleton. Finally, at 15 dpa, we  
345 observed an evident reduction in the skeletal length (yellow arrowheads) and a defined blastema distal  
346 to those skeletal elements (white dashed line). At this point, very few EdU<sup>+</sup> cells were found next to the  
347 skeleton.

348 Although proliferation is mainly observed where blastema is forming, distal migration of EdU<sup>+</sup>  
349 after division is also expected. The site of blastema formation was further assessed using a blastema  
350 marker in intact and 7 dpa limbs. We chose *Kazald1*, since it was shown to play a critical role in blastema  
351 formation (Bryant et al., 2017). Similar to the EdU<sup>+</sup> labeling, we observed that *Kazald1*<sup>+</sup> cells were  
352 located behind the amputation plane, surrounding the distal ends of the skeletal elements (dashed lines),  
353 in a zone where resorption is very likely to occur (Fig. 7C). These results suggest that blastema formation  
354 occurs in the same region and at the same time as resorption, and that using the skeletal element as a  
355 boundary for blastema identity, may provide an incomplete view of the course of regeneration.

356 Finally, to assess the cellular dynamics of skeletal resorption/formation, we used a *Sox9:Sox9-*  
357 *T2a-mCherrynl*s transgenic line in conjunction with calcein staining to follow both processes *in vivo*.  
358 We performed amputation of the distal phalanx and followed the same amputated digit at different dpa  
359 (Fig. 7D). At 0 dpa, no mCherry<sup>+</sup> cells were found outside the calcified tissue. At 9 dpa, we observed a  
360 break in the calcified phalanx (arrowhead) which shows a place where resorption was initiated. At 11  
361 dpa, we observed a disorganized aggrupation of mCherry<sup>+</sup> cells distal to the resorbed calcified tissue  
362 (white arrowhead). Those cells might represent the initial condensation of the regenerating cartilage.  
363 Interestingly, at 13 dpa, resorption continued (yellow arrowhead) and we saw an increase in the number  
364 and density of mCherry<sup>+</sup> cells. Finally, at 15 dpa, resorption was finished and the condensation of  
365 mCherry<sup>+</sup> cells in the new phalanx presented defined pattern. The condensation observed from 11 dpa,  
366 occurred behind the amputation plane, supporting our previous results. Moreover, these results show  
367 that resorption and skeletal regeneration are overlapping processes.

368 **DISCUSSION**

369

370 Axolotl limb regeneration is an intricated multi-step process that requires the fine tuning of  
371 events such as wound closure, tissue repair, progenitor cells recruitment and the re-establishment of the  
372 functional unit. Although extensive work has been done to understand the cellular dynamics of blastema  
373 formation, other processes such as tissue histolysis, the immune response and tissue integration have yet  
374 to be fully understood.

375 Here, we report that upon digit and zeugopod amputation, significant skeletal resorption occurs  
376 which is carried out by an osteoclast population and can result in the resorption of 100% of the calcified  
377 matrix. Skeletal resorption is observed in young animals with cartilaginous limbs as well as young adult  
378 animals with ossified bones. Upon inhibition of resorption, we observed a clear failure in the integration  
379 of the regenerated zeugopodial elements and, interestingly, this failure can also occur in untreated  
380 animals undergoing regeneration. Moreover, we present strong evidence supporting the role of the WE  
381 in resorption induction. Finally, we observed a spatial correlation between resorption progression and  
382 blastema formation. Particularly, we found that the condensation of new cartilage started before the  
383 resorptive process is completed.

384 Similar to salamanders, mouse digit tip regeneration progresses with early histolysis and  
385 blastema formation. An extensive resorption of the phalanx can lead to bone volume reduction of almost  
386 50% of its original size (Fernando et al., 2011). When osteoclasts are inhibited, regeneration is not  
387 compromised (Simkin et al., 2017) and when wound closure is induced earlier, resorption is delayed  
388 and regeneration progresses (Simkin et al., 2015). This suggest than in mouse digit tip resorption  
389 facilitates blastema formation. Moreover, it has been shown that both periosteal and endosteal cells are  
390 responsible for regeneration of the phalanx upon amputation in mice (Dawson et al., 2018), suggesting  
391 that bone resorption may be required for mobilization of a pool of progenitor cells. Although bone  
392 resorption is not required for regeneration to progress, this histolytic process is indeed an important  
393 event for the efficient regeneration of the mouse digit tip. In contrast to mouse, axolotl skeletal elements  
394 do not mobilize progenitors to the blastema and wound closure occurs within hours upon amputation,  
395 even when skeletal structures protrude at the surface. An important similarity to our findings in axolotl  
396 is the time frame when resorption occurs (7-15 dpa). This suggest that the unique fast activation and  
397 clearance of osteoclasts is particular to regeneration.

398

399 **Resorption efficiency defines skeletal integration success**

400 In this work, osteoclast inhibition resulted in a clear failure in tissue integration. This phenotype  
401 often presented as an angulation of the radius, heterotopic cartilage formation in the ulna, or a complete  
402 separation between the mature and the regenerated structures. In general, we observed a higher rate of  
403 resorption for the ulna than for the radius, which could account for the more striking integration  
404 phenotypes reported for the radius.

405 Our experiments revealed a gradient of integration phenotypes correlated with the amount of  
406 tissue resorbed: the more resorption, the better the integration. Strikingly, in animals undergoing normal  
407 regeneration we often observed faulty integration phenotypes in mineralized skeleton, as seen by  
408 angulations at the stump-regenerated interphase. A recent report, showing abnormally regenerated limbs  
409 in almost 50% of the animals, showed some similar phenotypes to the ones presented here, i.e. a  
410 narrowing in the diaphysis and some heterotopic cartilage formation (Bothe et al., 2020). Using  
411 polarization microscopy, we presented evidence of an ECM disorganization in the interphase region  
412 where both stump and regenerated tissue are connected. Finally, we showed a prevalence of these  
413 phenotypes at 90 dpa, proving that they are not resolved after regeneration has been completed.

414 Remarkably, we observed a high variability in the amount of calcified tissue resorbed in  
415 different animals, ranging from 25 to 100% for radius and ulna, being the inter-assay variability higher  
416 than the intra-assay. The source of this variability could be an environmental factor (e.g. water  
417 temperature), but it highlights the different outcomes that skeletal regeneration can produce. Indeed, in  
418 some cases, resorption involved a sequential degradation of the skeletal tissue, and at other times, it  
419 involved the break and shedding of a skeleton piece, which has been observed in mouse digit tip  
420 (Fernando et al., 2011). In contrast to mouse, skeletal shedding in the axolotl is not associated with  
421 wound re-epithelialization, as this occurs after wound closure.

422 Our results highlight the misconception that axolotl limb regeneration recapitulates the pre-  
423 existing morphology with high fidelity. This report reveals that a faulty skeletal regeneration is a rather  
424 common outcome in the axolotl limb, and correlates resorption efficiency with successful skeletal  
425 integration.

426

### 427 **Wound epithelium, resorption and blastema**

428 The WE is a critical structure for the progression of regeneration, regulating process such as  
429 ECM remodeling, tissue histolysis, proliferation and inflammation (Tsai et al., 2020). Here, by blocking  
430 the formation of the WE, we underscore its role in the initiation of resorption. Moreover, we analyzed  
431 available WE RNA-seq data and found several factors known to influence osteoclast progenitor  
432 migration and/or differentiation. Among those candidates, *Sphk1*, *Ccl4* and *Mdka* are up-regulated in  
433 the epithelial fraction during regeneration and have been linked to osteoclast biology. Indeed, S1P,  
434 which is phosphorylated by the sphingosine kinase (SPHK), has been shown to have a role in both bone  
435 resorption and bone formation (Ishii et al., 2009; Pederson et al., 2008; Ryu et al., 2006), while CCL4  
436 and MDKA have been connected with osteoclast progenitors recruitment (Maruyama et al., 2004; Xuan  
437 et al., 2017). Future studies to understand how these factors are regulated in osteoclast-mediated  
438 resorption during regeneration will be needed.

439 We hypothesized that the connection between the WE and skeletal resorption could be mediated  
440 by a zone of influence determined by the WE position. Our results show that resorption starts distally,  
441 enclosed by the WE boundaries, supporting this idea. Although the WE may not be the only source of

442 factors inducing osteoclast progenitor migration and differentiation, it probably is a general source of  
443 chemokines inducing the recruitment of RANK<sup>+</sup> myeloid progenitors. We hypothesize that those  
444 myeloid cells will then recognize factors secreted by the skeletal elements that promote osteoclast  
445 differentiation. Indeed, the main source of RANKL in mammals are both hypertrophic chondrocytes  
446 and osteocytes (Xiong et al., 2011).

447 In this work, we also provide evidence supporting a spatiotemporal correlation between skeletal  
448 resorption and blastema formation. The WE produces signals involved in blastema proliferation and  
449 patterning (Boilly and Albert, 1990; Ghosh et al., 2008; Han et al., 2001; Tsai et al., 2020), and those  
450 signals could be acting in the same zone of influence. Moreover, since the skeletal elements are  
451 structural supports of the limb, the resorption of the hard matrix might cause a collapse of the soft tissue  
452 towards the proximal region, and thus a formation of the blastema behind the amputation plane. Indeed,  
453 we observed EdU<sup>+</sup> cells and *Kazald1*<sup>+</sup> cells in the surroundings of the skeletal elements shortly before  
454 the start of resorption, and condensation of skeletal progenitors distal to the resorbed tissue and under  
455 the amputation plane.

456 Historically, the amputation plane has been conceptualized as a fixed position in the limb which  
457 determines the beginning of the blastema. However, the majority of the amputation experiments are  
458 performed by trimming the skeletal elements because this ensures consistency on the formation of a  
459 blastema. In this surgical procedure, the skin of the amputated limb is retracted and the extending  
460 skeletal elements are re-amputated. Trimming results in a faster WE and blastema formation; however,  
461 this procedure might cause the erroneous perception of a fixed amputation plane. Comparatively, in the  
462 case of the mouse digit tip, in which bone resorption occurs, a regeneration plane has been identified as  
463 more proximal than the amputation plane. (Seifert and Muneoka, 2018). This study has implications for  
464 demarcating the blastema, the mature cell source and the dynamic interphase created by nascent,  
465 migrating cells and a stream of morphogens.

466

## 467 **Future perspectives**

468 There are still unresolved questions regarding the osteoclast population here described. First,  
469 what is the origin of this population during regeneration? Upon amputation, a peak of myeloid  
470 chemotactic molecules was reported at 1 dpa, followed by an infiltration of myeloid cells and  
471 macrophages (Godwin et al., 2013). This could suggest that osteoclast progenitors are recruited to the  
472 amputation plane, but it does not rule out the participation of resident progenitors in the neighboring  
473 tissues. Second, what is the fate of osteoclasts after resorption? We show here that this population  
474 eventually disappears and even shows some signs of apoptosis, but whether all undergo apoptosis or if  
475 some will recirculate, remains unknown. Current understanding of osteoclast biology suggest that they  
476 are short-lived cells, which undergo apoptosis after ca. 2 weeks (Manolagas, 2000). However, recent  
477 works have shown that osteoclasts can be longer lived (Jacome-Galarza et al., 2019) or be recycled via  
478 a cell type named osteomorphs (McDonald et al., 2021). These studies underline the need to continue

479 investigating osteoclast biology *in vivo*, and particularly in this rapidly-triggered response to  
480 regeneration. The axolotl limb presents a new paradigm in which osteoclast function can be assessed,  
481 and thus the development of new transgenic lines to label myeloid progenitors and to indelibly label  
482 osteoclast will provide a mean to resolve the aforementioned questions.

483 In addition, the concomitant resorption and regeneration need to be further explored. It is  
484 known that histolysis helps with the mobilization of progenitor cells in salamanders (Thornton, 1938b)  
485 and in mouse (Dawson et al., 2018), but how osteoclast-mediated resorption could be influencing  
486 cartilage condensation in the context of axolotl regeneration remains to be studied. Specifically, how  
487 the cell differentiation and migration is orchestrated with respect to resorption is unclear. Of particular  
488 interest are periskeletal cells migrating from the periphery of the skeletal element towards the blastema,  
489 and contributing to the formation of the proximal skeleton. The cell source zone, i.e. a zone where  
490 blastema cells are recruited, has been roughly defined to be 500  $\mu\text{m}$  from the amputation plane.  
491 However, resorption was not analyzed in that study (Currie et al., 2016). It is unclear how resorption  
492 and the detachment and migration of periskeletal cells are coordinated, or if the source of periskeletal  
493 cells correspond to a region not resorbed (e.g. proximal to the calcified tissue). Previous works have  
494 demonstrated the interaction between osteoclast and osteoblasts *in vivo* (Furuya et al., 2018; Ikebuchi  
495 et al., 2018), and the *in vivo* assessment of this in the context of skeletal regeneration would be necessary.

496 Finally, we need to consider the context in which resorption is occurring since different cell  
497 types are found in the same skeletal element along the proximo-distal axis, and this could influence the  
498 outcome of resorption in skeletal regeneration (Riquelme-Guzmán et al., 2021).

499

## 500 **Concluding remarks**

501 This work presents a systematic assessment of the timing, extent and consequences of skeletal  
502 resorption. We show that the skeleton undergoes a massive and rapid histolytic event which is essential  
503 for a successful integration of the regenerated structure. This process, which is carried out by osteoclasts,  
504 is influenced by the formation of the WE and is correlated with the spatial position of the early blastema.  
505 Furthermore, we present proof that the axolotl limb regeneration is not perfect and it often leads to  
506 abnormal skeletal phenotypes. We consider that resorption is playing a key role in skeletal regeneration  
507 and its implications for regeneration needs to be further explored, particularly its coordination with cell  
508 migration and condensation of the new skeleton.



## 509 MATERIALS AND METHODS

510

### 511 Axolotl husbandry and transgenesis

512 Axolotls (*Ambystoma mexicanum*) were maintained at the CRTD axolotl facility and at Harvard  
513 University. All procedures were performed according to the Animal Ethics Committee of the State of  
514 Saxony, Germany, and the Institutional Animal Care and Use Committee (IACUC) Guidelines at  
515 Harvard University (Protocol 11-32). Animals used were selected by its size (snout to tail = ST). Most  
516 experiments were done using animals 4-6 cm ST, unless stated otherwise. We performed experiments  
517 using white axolotls (*d/d*). In addition, we utilized transgenic lines shown in table I.

518

519 Table I: Transgenic lines used in this work.

| Name                                                                    | Here referred as               | Reference                      |
|-------------------------------------------------------------------------|--------------------------------|--------------------------------|
| C-Ti <sup>+/+</sup> ( <i>Sox9:Sox9-T2a-mCherrynl</i> ) <sup>ETNKA</sup> | <i>Sox9:Sox9-T2a-mCherrynl</i> | (Riquelme-Guzmán et al., 2021) |
| tgTol2( <i>Drer.Ctsk:mRuby3</i> ) <sup>ISG</sup>                        | <i>Ctsk:mRuby3</i>             | This work                      |
| tgTol2( <i>Drer.Ctsk:eGFP</i> ) <sup>ISG</sup>                          | <i>Ctsk:eGFP</i>               | This work                      |

520

521 To generate the *Ctsk:mRuby3* or *Ctsk:eGFP* transgenic lines, a plasmid containing 4 kb of *Ctsk*  
522 promoter from zebrafish together with *Tol2* sequences was used (kind gift from Knopf Lab at CRTD  
523 and Gilbert Weidinger at Ulm University). The *mRuby3* or *eGFP* coding region was cloned 3' from the  
524 promoter. For ligation, plasmid restriction was performed using the FseI and XhoI restriction enzymes  
525 (#R0588S, #R0146S respectively; New England BioLabs, Frankfurt am Main, Germany). Fertilized  
526 embryos from *d/d* axolotls were injected with the *Ctsk:mRuby3* or *Ctsk:eGFP* vector and *Tol2* mRNA  
527 as previously described (Khattak et al., 2014). F0 animals were selected and grown in our colony until  
528 sexual maturity. For experiments, F0 were crossed with a *d/d* axolotl, and F1 animals were used.

529

### 530 Experimental procedures in axolotls

531 *In vivo* skeletal staining was performed using calcein (#C0875, Sigma-Aldrich, Darmstadt,  
532 Germany) or alizarin red (#A5533, Sigma-Aldrich) A 0.1% solution was prepared for either dye with  
533 swimming water. Axolotls were submerged in solution for 5 - 10 minutes in the dark. After staining,  
534 animals were transferred to a tank with clean swimming water, which was changed as many times until  
535 water was not stained. Amputations were performed either 10 minutes after staining or the next day for  
536 better visualization.

537 For amputations, animals were anesthetized with 0.01% benzocaine solution. All amputations  
538 were performed at the distal end of the calcified diaphysis using an Olympus SZX16 stereomicroscope.  
539 After surgical procedure, animals were covered with a wet tissue (with benzocaine) and allowed to

540 recover for 10 minutes prior to be transferred back to swimming water. The full skin flat surgery (FSF)  
541 was performed as described in (Tsai, 2020; Tsai et al., 2020).

542 Zoledronic acid (#SML0223, Sigma-Aldrich) treatment and EdU (#C10337, Invitrogen,  
543 Darmstadt, Germany) labelling were done by intraperitoneal injections in anesthetized axolotls. 200  
544  $\mu\text{g}/\text{kg}$  of zoledronic acid were injected every 3 days (stock 1  $\text{mg}/\text{mL}$  in APBS (80% PBS)). 10  $\mu\text{g}/\text{g}$  of  
545 EdU were injected 4 hours prior to tissue collection (stock 2.5  $\text{mg}/\text{mL}$  in DMSO). Injection volume was  
546 adjusted to 10  $\mu\text{L}$  with APBS. After injections, animals were kept covered with a wet paper for 10  
547 minutes before returning them into the water tank.

548 *In vivo* imaging was performed in anesthetized animals. For stereoscope imaging, animals were  
549 placed in a 100 mm petri dish and limb was positioned accordingly. An Olympus SZX16 stereoscope  
550 microscope (objective: SDF Plapo 1xPF) was used. For confocal imaging, animals were place in a glass  
551 bottom dish ( $\varnothing$ : 50/40 mm, #HBSB-5040, Willco Wells, Amsterdam, The Netherlands). A wet tissue  
552 with benzocaine was laid on top of the animal to avoid it to dry, and a silica block was laid on top of the  
553 hand to flatten it and improve light penetrance. A Zeiss confocal laser scanning microscope LSM780  
554 (objectives: Plan apochromat 10x/0.45 or Plan-apochromat 20x/0.8) was used.

555 For tissue collection, animals were anesthetized prior to collection. After it, animals were  
556 euthanized by exposing them to lethal anesthesia (0.1% benzocaine) for at least 20 min. Tissue fixation  
557 and further procedures are described specifically for each case.

558

### 559 **Paraffin sectioning and Masson's trichrome staining**

560 Limbs were isolated and fixed with MEMFa 1x (MOPS 0.1M pH 7.4 / EGTA 2 mM /  
561  $\text{MgSO}_4 \cdot 7\text{H}_2\text{O}$  1 mM / 3.7% formaldehyde) overnight at 4°C. Samples were washed with PBS and  
562 dehydrated with serial EtOH washes (25, 50, 70 and x3 100%). Samples were then incubated three times  
563 with Roti®Histol (#6640, Carl Roth, Karlsruhe, Germany) at RT and four times with paraffin (Roti®-  
564 Plast, #6642, Carl Roth) at 65°C in glass containers. After last incubation, samples were embedded in  
565 paraffin using plastic containers and stored at RT. Longitudinal sections of 6  $\mu\text{m}$  thickness were  
566 obtained.

567 Masson's trichrome staining on paraffin sections was performed following the producer's  
568 recommendations (Procedure No. HT15, Sigma-Aldrich). Imaging was performed in a Zeiss Axio  
569 Observer.Z1 inverted microscope (objective: Plan-apochromat 20x/0.8).

570

### 571 **Cryosectioning**

572 Limbs fixed with MEMFa were washed with PBS and decalcified with EDTA 0.5 M at 4°C for  
573 48 hours. Next, limbs were washed with PBS and incubated overnight with sucrose 30% at 4°C. Samples  
574 were embedded in O.C.T. compound (#4583, Tissue-Tek, Umkirch, Germany) using plastic molds and  
575 frozen with dry ice for 1 hour prior to storage at -20°C. Longitudinal sections of 12  $\mu\text{m}$  thickness were  
576 cut and mounted on superfrost slides. Slides were kept at -20°C until processed.

## 577 **TRAP enzymatic staining**

578 Tartrate-resistant acid phosphatase (TRAP) enzymatic staining was performed in cryosections.  
579 Slides were dried for 1 hour prior to wash them with PBS + 0.1% Tween-20 for 10 minutes. Next, slides  
580 were permeabilised with PBS + 0.3% Tx-100 for 1 hour. After permeabilization, slides were equilibrated  
581 by three washes with TRAP buffer (NaAcetate 0.1M / acetic acid 0.1M / NaTartrate 50 mM / pH 5.2)  
582 for 10 minutes at 37°C in water bath. Slides were stained with color reaction buffer (TRAP buffer /  
583 Naphthol AS-MX phosphate 1.5 mM / Fast Red Violet LB Salt 0.5 mM) for 1 hour at 37°C in water  
584 bath. After staining, slides were washed three times with PBS for 10 minutes and mounted with  
585 Entellan™ (#1.07960, Sigma-Aldrich). Images were taken in a Zeiss Axio Observer.Z1 inverted  
586 microscope.

587

## 588 **Immunofluorescence**

589 For immunofluorescence (IF), cryosections were used. Slides were dried at RT for at least 1  
590 hour. Sections were washed three times with PBS + 0.3% Tx-100 prior to blocking with PBS + 0.3%  
591 Tx-100 + 10% normal horse serum (NHS, #S-2000-20, Vector Labs, Burlingame, CA, USA) for 1 hour.  
592 Primary anti-CTSK (#ab19027, Abcam, Cambridge, UK) antibody incubation (1:20) was done in  
593 blocking solution for 1 hour at RT and then overnight at 4°C. Sections were then washed three times  
594 with PBS + 0.3% Tx-100 and incubated with Goat anti-Rabbit, Alexa Fluor 647 antibody (1:200, #A-  
595 21245, Invitrogen) and Hoechst 33342 1:1000 for 2 hours. Finally, sections were washed three times  
596 with PBS + 0.3% Tx-100 and mounted using Mowiol mounting medium (#0713 Carl Roth). Imaging  
597 was performed on a Zeiss Axio Observer.Z1 inverted microscope with an ApoTomel system  
598 (objectives: Plan-apochromat 10x/0.45 or Plan-apochromat 20x/0.8).

599

## 600 **RNA probes for *in situ* hybridization**

601 *Ctsk*, *Kazald1* and *Krt17* probes were created by TA cloning. Probe amplification was done  
602 using primers previously published (Table II). Ligation was done into a pGEM®-T easy vector system  
603 I (#A1360, Promega, Madison, WI, USA). To confirm successful cloning, vectors were purified and  
604 sequenced using the Mix2Seq Kit (Eurofins Genomics, Ebersberg, Germany).

605

606 Table II: Primers for ISH probes cloning.

| Gene           | Forward                      | Reverse                        | Reference             |
|----------------|------------------------------|--------------------------------|-----------------------|
| <i>Ctsk</i>    | GTGCAGAACCG<br>ACCCGATG      | CAGCTGGACT<br>CGGAGTGATGC      | (Bryant et al., 2017) |
| <i>Kazald1</i> | CTCGTGACATC<br>CTGAGCCTGGAAG | GAAAATGGATAA<br>GGTGGTGGGGAGGG | (Bryant et al., 2017) |
| <i>Krt17</i>   | CCTCTTGAC<br>GTGAAGACC       | CCAGAGAAGATGA<br>GCATACATCGG   | (Leigh et al., 2018)  |

607

608 For synthesizing the ISH probes, *in vitro* transcription was carried out using a T7 polymerase  
609 (#RPOLT7-RO, Roche, Mannheim, Germany) or a SP6 polymerase (#RPOLSP6-RO, Roche) following  
610 provider's instructions. Prior to transcription, 5 µg of plasmid were linearized using the restriction  
611 enzyme SpeI-HF® (#R3133S, New England BioLabs) for *Ctsk* and *Krt17*, or SphI-HF® (#R3182S,  
612 New England BioLabs) for *Kazald1*. Probes were purified using the RNAeasy® Mini Kit (#74104,  
613 QIAGEN, Hilden, Germany) according to provider's instructions.

614

### 615 ***In situ* hybridization (ISH)**

616 ISH was performed in cryosections using *Ctsk* probe following a previously published protocol  
617 (Knapp et al., 2013). When the protocol was finished, slides were fixed in formaldehyde 4% overnight  
618 at RT. Slides were then dehydrated with serial EtOH washes (25, 50, 70 and 100%) prior to wash with  
619 Roti®Histol and mounting with Entellan™. Imaging was performed on a Zeiss Axio Observer.Z1  
620 inverted microscope.

621

### 622 **Whole mount *in situ* hybridization (WISH)**

623 Whole mount ISH was performed using *Krt17* and *Kazald1* probes. Protocol was adapted from  
624 (Woltering et al., 2009). Briefly, samples were dehydrated with serial MetOH washes (25, 50, 75% in  
625 PBS + 0.1% Tween-20 and 100%). Limbs were bleached in MetOH + 6% H<sub>2</sub>O<sub>2</sub> at RT and then  
626 rehydrated with serial washes of MetOH. Then, limbs were washed with TBST (1x TBS, 0.1% Tween-  
627 20) and treated with 20 µg/mL Proteinase K in TBST for 30 min at 37°C. After incubation, limbs were  
628 washed with TBST and rinsed with trietanolamine 0.1M pH 7.5 (#90278, Sigma-Aldrich). Limbs were  
629 incubated with freshly prepared 0.1M TEA + 1% acetic anhydride (#320102, Sigma-Aldrich) for 10  
630 minutes and then washed again with TBST. Next, limbs were fixed with 4% PFA + 0.2% glutaraldehyde  
631 (#G6257, Sigma-Aldrich) for 20 minutes and washed with TBST. TBST was removed and limbs were  
632 incubated with previously warmed Pre-Hyb solution (hybridization buffer without probe) at 60 °C for 4  
633 hours, prior to be transferred into pre-warmed hybridization buffer + probe (6 µL/mL) and incubated  
634 overnight at 60°C. The next day, limbs were washed at 60°C with pre-warmed 5xSSC solution twice  
635 for 30 minutes, with 2xSSC solution three times for 20 minutes, and with 0.2xSSC three times for 20  
636 minutes. Limbs were then washed with TNE solution twice for 10 minutes at RT prior to incubation  
637 with 20 µg/mL RNase A in TNE solution for 15 minutes. After incubation, limbs were washed with  
638 TNE solution twice for 10 minutes, and with MAB solution three times for 5 minutes. Limbs were  
639 blocked with MAB solution + 1% blocking reagent for 1.5 hours, and then incubated with MAB solution  
640 + 1% blocking reagent + 1:3000 anti-digoxigenin-AP, Fab fragments for 4 hours at RT. Next, limbs  
641 were washed with MAB solution three times for 5 minutes each and then overnight at RT. On day 3,  
642 limbs were washed with MAB solution five times for 1 hour each and again overnight. After MAB  
643 washes, limbs were washed with NTMT three times for 10 minutes at RT, and then incubated with

644 freshly made NTMT + 20  $\mu$ L/mL NBT/BCIP (#11681451001, Roche). For both *Kazald1* and *Krt17*  
645 probes, 4-6 hours of incubation were enough for signal to develop. Reaction was then stopped by  
646 incubating with PBS + 0.1% Tween-20 twice for 10 minutes and then fixing with 4% PFA at 4°C  
647 overnight. After fixation, limbs were washed with PBS + 0.1% Tween-20 and stored in that solution at  
648 RT. Imaging was performed on a Zeiss Discovery.V20 stereomicroscope.

649

#### 650 **Alcian blue/alizarin red staining**

651 Staining was performed as recently described (Riquelme-Guzmán et al., 2021). Imaging was  
652 performed on a Zeiss Discovery.V20 stereomicroscope (objective: Plan S 1.0x).

653

#### 654 **Whole mount EdU staining**

655 Limbs from axolotls injected with EdU were fixed with MEMFa 1x overnight at 4°C and then  
656 washed with PBS. For whole mount EdU staining, limbs were washed with PBS + 0.3% Tx-100 twice  
657 for 2 hours and then blocked with PBS + 0.3% Tx-100 + 5% goat serum + 10% DMSO for 24 hours at  
658 RT. Click-iT<sup>TM</sup> EdU cell proliferation kit, Alexa Fluor 488 (#C10337, Invitrogen) was used following  
659 provider's instructions. Samples were incubated in reaction cocktail for 4 hours at RT. After incubation,  
660 samples were washed with PBS + 0.3% Tx-100 four times for 15 min. Next, samples were incubated  
661 with TO-PRO<sup>TM</sup>-3 1:10.000 in PBS + 0.3% Tx-100 for 1 hour at RT. Finally, limbs were washed with  
662 PBS four times for 15 min each at RT. Limbs were cleared by dehydration with serial washes of EtOH  
663 (25, 50, 70, 100%) for 2 hours each at 4°C. Samples were then incubated overnight in 100% EtOH at  
664 4°C prior to clearing with ethyl cinnamate (#112372, Sigma-Aldrich) at RT for at least 2 hours. Samples  
665 were imaged the same day on a Zeiss confocal laser scanning microscope LSM 780.

666

#### 667 **RNA purification and RT-qPCR**

668 Limbs for RNA isolation were stored in RNAlater<sup>TM</sup> (#AM7024, Invitrogen) at -20°C until all  
669 samples were collected. RNA isolation was performed using the RNAeasy® Mini Kit. 50 ng of RNA  
670 were used for cDNA synthesis using the PrimeScript<sup>TM</sup> RT reagent Kit (#RR037A, Takara, Göteborg,  
671 Sweden) following the provider's instructions. RT-qPCR was performed using the TB Green® Premix  
672 Ex Taq<sup>TM</sup> (Tli RNaseH Plus) kit (#RR420A, Takara). RT-qPCR was done using a LightCycler 480  
673 system with a pre-defined protocol for SYBR Green. Results were analyzed using the  $\Delta\Delta$ CT method  
674 and the *Rpl4* housekeeping gene. After analysis, results were shown as relative levels compared to a  
675 control. Primer pairs used are listed in Table III.

676

677 Table III: Primer pairs used for RT-qPCR.

| Gene           | Forward               | Reverse               |
|----------------|-----------------------|-----------------------|
| <i>Rpl4</i>    | TGAAGAACTTGAGGGTCATGG | CTTGGCGTCTGCAGATTTTTT |
| <i>Ctsk</i>    | TGGCCCTTTTAACAACACCG  | ACTGAGTTGCAACAGCTTCC  |
| <i>Trap</i>    | TCATTGCCTGGTCAAGCATC  | TGGGCATAGTAGAACCGCAA  |
| <i>Dcstamp</i> | TGGAAACCAAAAGTGCAGCG  | CCCCTCAGTGCCATCATTGT  |

678

### 679 Polarization microscopy

680 The LC-PolScope is a powerful tool to quantitatively image optically anisotropic materials  
681 having a refractive index that depends on the polarization and propagation of light (birefringence), such  
682 as collagen, the main component of cartilage ECM (Fox et al., 2009). An LC-PolScope (on a Ti Eclipse  
683 microscope body) with a sCMOS camera (Hamamatsu Orca Flash 4.0) was used. Acquisitions were  
684 done with a 20x/0.8 objective and using  $\mu$ Manager software (Edelstein et al., 2014). Two images were  
685 acquired: the retardance and the slow axis orientation. The retardance correlates with the amount of  
686 birefringent components, while the slow axis orientation image provides information on the orientation  
687 of those components, i.e. the angle in which they are aligned in the sample. Retardance and slow axis  
688 orientation images were aligned using a custom-made MATLAB script such that the x-axis  
689 corresponded to the proximodistal axis and the y-axis corresponded to the anteroposterior axis, with the  
690 elbow on the top-right corner of the image. The angle was measured respect to the proximodistal axis.  
691 Once the images were aligned, the regions of interest were cropped and segmented using the Trainable  
692 Weka Segmentation plugin from Fiji (Arganda-Carreras et al., 2017). The segmentation was done to  
693 obtain masks for the collagen regions and to remove the cells from the analysis. The masks were then  
694 applied to the slow axis orientation images and the orientations of the collagen fibers were quantified  
695 using MATLAB.

696

### 697 Curating RNA-seq data

698 Recently published axolotl RNA-seq datasets (Tsai et al., 2020, 2019) were used to evaluate  
699 osteoclasts-related transcripts levels in samples upon full skin flap surgery. For curating the datasets, R  
700 Studio was used (RStudio Team, <http://www.rstudio.com/>). In order to find osteoclasts-related  
701 transcripts identifiers, the human, mouse and xenopus protein orthologous for each transcript were used.  
702 With the protein sequences, a protein blast was performed using the predicted proteins from Bryant et  
703 al. *de novo* axolotl transcriptome (supplementary data Bryant et al., 2017). The best three matches for  
704 each protein were used for browsing in Tsai's transcriptome. The datasets from both of Tsai et al. works  
705 were combined and filtered in order to have only the results from 0 dpa, 5 dpa and 5 dpa in FSF surgery.  
706 In addition, the 2N, 4N and EP fractions at 5 dpa were also filtered from the combined datasets. For  
707 organizing, filtering and calculating z-scores in the datasets, the tidyverse package (Wickham et al.,

708 2019) and plyr package (Wickham, 2011) were used. For creating the heatmaps, the ggplot2 package  
709 was used (Wickham, 2016).

710 To find possible candidates involved in osteoclast recruitment and differentiation, a search in  
711 the available literature was done for each differentially down-regulated transcript in FSF samples (385  
712 transcripts, Tsai et al., 2020 supplementary data). Transcripts which have been connected to osteoclast  
713 function or belong to a protein family shown to play a role in osteoclast recruitment and differentiation,  
714 were filtered and heatmaps were created for better visualization of the levels during regeneration and in  
715 the different fractions (Fig 18C, D).

716

#### 717 **μCT scan**

718 Scans were performed as recently described (Riquelme-Guzmán et al., 2021). Threshold was  
719 set to 220 mg HA/cm<sup>3</sup>.

720

#### 721 **Statistical analysis**

722 Statistical analyses were performed using the software Prism9 (GraphPad Software, LLC, San  
723 Diego, CA, USA) for macOS. Statistical tests performed are described in each figure. P-values < 0.05  
724 were considered statistically significant.

725

#### 726 **Image processing and figure design**

727 All images were processed using Fiji (Schindelin et al., 2012). Processing involved selecting  
728 regions of interest, merging or splitting channels and improving brightness levels for proper presentation  
729 in figures. Maximum intensity projections were done in some confocal images and it is stated in the  
730 respective figure's descriptions. Stitching of tiles was done directly in the acquisition software Zen  
731 (Zeiss Microscopy, Jena, Germany). Figures were created using Affinity Designer (Serif Europe, West  
732 Bridgford, UK).

733 **ACKNOWLEDGMENTS**

734

735 We thank all the members from the Sandoval-Guzmán lab for continuous support during the  
736 development of this work. We are also grateful to Anja Wagner, Beate Gruhl and Judith Konantz for  
737 their impeccable dedication to the axolotl care. This work was funded by a DFG Research Grant  
738 (432439166). CRG was supported by the DIGS-BB Fellow award. This work was supported by the  
739 Light Microscopy Facility, a Core Facility of the CMCB Technology Platform at TU Dresden.

740

741 **COMPETING INTERESTS**

742

743 No conflicts of interest, financial or otherwise, are declared by the authors.



744 **REFERENCES**

745  
746

- 747 Arganda-Carreras I, Kaynig V, Rueden C, Eliceiri KW, Schindelin J, Cardona A, Seung HS. 2017.  
748 Trainable Weka Segmentation: a machine learning tool for microscopy pixel classification.  
749 *Bioinformatics* 33:2424–2426. doi:10.1093/bioinformatics/btx180
- 750 Aztekin C. 2021. Tissues and Cell Types of Appendage Regeneration: A Detailed Look at the Wound  
751 Epidermis and Its Specialized Forms. *Front Physiol* 12:771040. doi:10.3389/fphys.2021.771040
- 752 Baker DA, Barth J, Chang R, Obeid LM, Gilkeson GS. 2010. Genetic Sphingosine Kinase 1  
753 Deficiency Significantly Decreases Synovial Inflammation and Joint Erosions in Murine TNF- $\alpha$ -  
754 Induced Arthritis. *J Immunol* 185:2570–2579. doi:10.4049/jimmunol.1000644
- 755 Blum N, Begemann G. 2015. Osteoblast de- and redifferentiation are controlled by a dynamic  
756 response to retinoic acid during zebrafish fin regeneration. *Development* 142:2894–2903.  
757 doi:10.1242/dev.120204
- 758 Boilly B, Albert P. 1990. In vitro control of blastema cell proliferation by extracts from epidermal cap  
759 and mesenchyme of regenerating limbs of axolotls. *Roux's Archives Dev Biology* 198:443–447.  
760 doi:10.1007/bf00399054
- 761 Bothe V, Mahlow K, Fröbisch NB. 2020. A histological study of normal and pathological limb  
762 regeneration in the Mexican axolotl *Ambystoma mexicanum*. *J Exp Zoology Part B Mol Dev Evol*.  
763 doi:10.1002/jez.b.22950
- 764 Bryant DM, Johnson K, DiTommaso T, Tickle T, Couger M, Payzin-Dogru D, Lee TJ, Leigh ND,  
765 Kuo T-H, Davis FG, Bateman J, Bryant S, Guzikowski AR, Tsai SL, Coyne S, Ye WW, Freeman  
766 RM, Peshkin L, Tabin CJ, Regev A, Haas BJ, Whited JL. 2017. A Tissue-Mapped Axolotl De  
767 Novo Transcriptome Enables Identification of Limb Regeneration Factors. *Cell Reports* 18:762–  
768 776. doi:10.1016/j.celrep.2016.12.063
- 769 Cappariello A, Maurizi A, Veeriah V, Teti A. 2014. The Great Beauty of the osteoclast. *Archives of*  
770 *Biochemistry and Biophysics* 558:70–78. doi:10.1016/j.abb.2014.06.017
- 771 Charles JF, Aliprantis AO. 2014. Osteoclasts: more than ‘bone eaters.’ *Trends in Molecular Medicine*  
772 20:449–459. doi:10.1016/j.molmed.2014.06.001
- 773 Clézardin P. 2013. Mechanisms of action of bisphosphonates in oncology: a scientific concept  
774 evolving from antiresorptive to anticancer activities. *Bonekey Reports* 2:267.  
775 doi:10.1038/bonekey.2013.1
- 776 Currie JD, Kawaguchi A, Traspas R, Schuez M, Chara O, Tanaka EM. 2016. Live Imaging of Axolotl  
777 Digit Regeneration Reveals Spatiotemporal Choreography of Diverse Connective Tissue  
778 Progenitor Pools. *Dev Cell* 39:411–423. doi:10.1016/j.devcel.2016.10.013
- 779 Dawson LA, Schanes PP, Kim P, Imholt FM, Qureshi O, Dolan CP, Yu L, Yan M, Zimmel KN, Falck  
780 AR, Muneoka K. 2018. Blastema formation and periosteal ossification in the regenerating adult  
781 mouse digit. *Wound repair and regeneration : official publication of the Wound Healing Society*  
782 *[and] the European Tissue Repair Society* 26:263–273. doi:10.1111/wrr.12666
- 783 Debuque RJ, Hart AJ, Johnson GH, Rosenthal NA, Godwin JW. 2021. Identification of the Adult  
784 Hematopoietic Liver as the Primary Reservoir for the Recruitment of Pro-regenerative

- 785 Macrophages Required for Salamander Limb Regeneration. *Frontiers Cell Dev Biology* 9:750587.  
786 doi:10.3389/fcell.2021.750587
- 787 Dhillon S. 2016. Zoledronic Acid (Reclast®, Aclasta®): A Review in Osteoporosis. *Drugs* 76:1683–  
788 1697. doi:10.1007/s40265-016-0662-4
- 789 Dunis DA, Namenwirth M. 1977. The role of grafted skin in the regeneration of X-irradiated axolotl  
790 limbs. *Dev Biol* 56:97–109. doi:10.1016/0012-1606(77)90157-9
- 791 Edelstein AD, Tsuchida MA, Amodaj N, Pinkard H, Vale RD, Stuurman N. 2014. Advanced methods  
792 of microscope control using µManager software. *J Biological Methods* 1:e10.  
793 doi:10.14440/jbm.2014.36
- 794 Einhorn TA, Gerstenfeld LC. 2015. Fracture healing: mechanisms and interventions. *Nat Rev*  
795 *Rheumatol* 11:45–54. doi:10.1038/nrrheum.2014.164
- 796 Fernando WA, Leininger E, Simkin J, Li N, Malcom CA, Sathyamoorthi S, Han M, Muneoka K.  
797 2011. Wound healing and blastema formation in regenerating digit tips of adult mice.  
798 *Developmental biology* 350:301–10. doi:10.1016/j.ydbio.2010.11.035
- 799 Fischman DA, Hay ED. 1962. Origin of osteoclasts from mononuclear leucocytes in regenerating  
800 newt limbs. *Anatomical Rec* 143:329–337. doi:10.1002/ar.1091430402
- 801 Fox AJS, Bedi A, Rodeo SA. 2009. The Basic Science of Articular Cartilage. *Sports Heal* 1:461–468.  
802 doi:10.1177/1941738109350438
- 803 Furuya M, Kikuta J, Fujimori S, Seno S, Maeda H, Shirazaki M, Uenaka M, Mizuno H, Iwamoto Y,  
804 Morimoto A, Hashimoto K, Ito T, Isogai Y, Kashii M, Kaito T, Ohba S, Chung U, Lichtler AC,  
805 Kikuchi K, Matsuda H, Yoshikawa H, Ishii M. 2018. Direct cell–cell contact between mature  
806 osteoblasts and osteoclasts dynamically controls their functions in vivo. *Nature Communications*  
807 9:300. doi:10.1038/s41467-017-02541-w
- 808 Gerber T, Murawala P, Knapp D, Masselink W, Schuez M, Hermann S, Gac-Santel M, Nowoshilow  
809 S, Kageyama J, Khattak S, Currie J, Camp GJ, Tanaka EM, Treutlein B. 2018. Single-cell analysis  
810 uncovers convergence of cell identities during axolotl limb regeneration. *Science* eaaq0681.  
811 doi:10.1126/science.aaq0681
- 812 Ghosh S, Roy S, Séguin C, Bryant SV, Gardiner DM. 2008. Analysis of the expression and function of  
813 Wnt-5a and Wnt-5b in developing and regenerating axolotl (*Ambystoma mexicanum*) limbs. *Dev*  
814 *Growth Differ* 50:289–297. doi:10.1111/j.1440-169x.2008.01000.x
- 815 Godwin JW, Pinto AR, Rosenthal NA. 2013. Macrophages are required for adult salamander limb  
816 regeneration. *Proceedings of the National Academy of Sciences of the United States of America*  
817 110:9415–20. doi:10.1073/pnas.1300290110
- 818 Han M, An J, Kim W. 2001. Expression patterns of Fgf-8 during development and limb regeneration  
819 of the axolotl. *Dev Dyn* 220:40–48. doi:10.1002/1097-0177(2000)9999:9999<:aid-  
820 dvdy1085>3.0.co;2-8
- 821 Hay ED, Fischman DA. 1961. Origin of the blastema in regenerating limbs of the newt *Triturus*  
822 *viridescens*: An autoradiographic study using tritiated thymidine to follow cell proliferation and  
823 migration. *Developmental Biology* 3:26–59. doi:https://doi.org/10.1016/0012-1606(61)90009-4

- 824 Huang T, Zuo L, Walczyńska KS, Zhu M, Liang Y. 2021. Essential roles of matrix metalloproteinases  
825 in axolotl digit regeneration. *Cell Tissue Res* 385:105–113. doi:10.1007/s00441-021-03434-7
- 826 Hutchison C, Pilote M, Roy S. 2007. The axolotl limb: A model for bone development, regeneration  
827 and fracture healing. *Bone* 40:45–56. doi:10.1016/j.bone.2006.07.005
- 828 Ikebuchi Y, Aoki S, Honma M, Hayashi M, Sugamori Y, Khan M, Kariya Y, Kato G, Tabata Y,  
829 Penninger JM, Udagawa N, Aoki K, Suzuki H. 2018. Coupling of bone resorption and formation  
830 by RANKL reverse signalling. *Nature* 561:195–200. doi:10.1038/s41586-018-0482-7
- 831 Ishii M, Egen JG, Klauschen F, Meier-Schellersheim M, Saeki Y, Vacher J, Proia RL, Germain RN.  
832 2009. Sphingosine-1-phosphate mobilizes osteoclast precursors and regulates bone homeostasis.  
833 *Nature* 458:524. doi:10.1038/nature07713
- 834 Jacome-Galarza CE, Percin GI, Muller JT, Mass E, Lazarov T, Eitler J, Rauner M, Yadav VK, Crozet  
835 L, Bohm M, Loyher P-L, Karsenty G, Waskow C, Geissmann F. 2019. Developmental origin,  
836 functional maintenance and genetic rescue of osteoclasts. *Nature* 1–5. doi:10.1038/s41586-019-  
837 1105-7
- 838 Johnson K, Bateman J, DiTommaso T, Wong AY, Whited JL. 2018. Systemic cell cycle activation is  
839 induced following complex tissue injury in axolotl. *Developmental Biology* 433:461–472.  
840 doi:10.1016/j.ydbio.2017.07.010
- 841 Khattak S, Murawala P, Andreas H, Kappert V, Schuez M, Sandoval-Guzmán T, Crawford K, Tanaka  
842 EM. 2014. Optimized axolotl (*Ambystoma mexicanum*) husbandry, breeding, metamorphosis,  
843 transgenesis and tamoxifen-mediated recombination. *Nat Protoc* 9:529–540.  
844 doi:10.1038/nprot.2014.040
- 845 Knapp D, Schulz H, Rascon C, Volkmer M, Scholz J, Nacu E, Le M, Novozhilov S, Tazaki A, Protze  
846 S, Jacob T, Hubner N, Habermann B, Tanaka EM. 2013. Comparative Transcriptional Profiling of  
847 the Axolotl Limb Identifies a Tripartite Regeneration-Specific Gene Program. *PLoS ONE*  
848 8:e61352. doi:10.1371/journal.pone.0061352
- 849 Kozhemyakina E, Lassar AB, Zelzer E. 2015. A pathway to bone: signaling molecules and  
850 transcription factors involved in chondrocyte development and maturation. *Development* 142:817–  
851 31. doi:10.1242/dev.105536
- 852 Kragl M, Knapp D, Nacu E, Khattak S, Maden M, Epperlein H, Tanaka EM. 2009. Cells keep a  
853 memory of their tissue origin during axolotl limb regeneration. *Nature* 460:60–65.  
854 doi:10.1038/nature08152
- 855 Leigh ND, Dunlap GS, Johnson K, Mariano R, Oshiro R, Wong AY, Bryant DM, Miller BM, Ratner  
856 A, Chen A, Ye WW, Haas BJ, Whited JL. 2018. Transcriptomic landscape of the blastema niche in  
857 regenerating adult axolotl limbs at single-cell resolution. *Nature Communications* 9:5153.  
858 doi:10.1038/s41467-018-07604-0
- 859 Manolagas SC. 2000. Birth and Death of Bone Cells: Basic Regulatory Mechanisms and Implications  
860 for the Pathogenesis and Treatment of Osteoporosis. *Endocr Rev* 21:115–137.  
861 doi:10.1210/edrv.21.2.0395
- 862 Maruyama K, Muramatsu H, Ishiguro N, Muramatsu T. 2004. Midkine, a heparin-binding growth  
863 factor, is fundamentally involved in the pathogenesis of rheumatoid arthritis. *Arthritis Rheumatism*  
864 50:1420–1429. doi:10.1002/art.20175

- 865 McCusker CD, Diaz-Castillo C, Sosnik J, Phan AQ, Gardiner DM. 2016. Cartilage and bone cells do  
866 not participate in skeletal regeneration in *Ambystoma mexicanum* limbs. *Dev Biol* 416:26–33.  
867 doi:10.1016/j.ydbio.2016.05.032
- 868 McDonald MM, Khoo WH, Ng PY, Xiao Y, Zamerli J, Thatcher P, Kyaw W, Pathmanandavel K,  
869 Grootveld AK, Moran I, Butt D, Nguyen A, Corr A, Warren S, Biro M, Butterfield NC, Guilfoyle  
870 SE, Komla-Ebri D, Dack MRG, Dewhurst HF, Logan JG, Li Y, Mohanty ST, Byrne N, Terry RL,  
871 Simic MK, Chai R, Quinn JMW, Youlten SE, Pettitt JA, Abi-Hanna D, Jain R, Weninger W,  
872 Lundberg M, Sun S, Ebetino FH, Timpson P, Lee WM, Baldock PA, Rogers MJ, Brink R,  
873 Williams GR, Bassett JHD, Kemp JP, Pavlos NJ, Croucher PI, Phan TG. 2021. Osteoclasts recycle  
874 via osteomorphs during RANKL-stimulated bone resorption. *Cell* 184:1330-1347.e13.  
875 doi:10.1016/j.cell.2021.02.002
- 876 Mescher AL. 1976. Effects on adult newt limb regeneration of partial and complete skin flaps over the  
877 amputation surface. *J Exp Zool* 195:117–127. doi:10.1002/jez.1401950111
- 878 Muneoka K, Fox WF, Bryant SV. 1986. Cellular contribution from dermis and cartilage to the  
879 regenerating limb blastema in axolotls. *Developmental Biology* 116:256–260. doi:10.1016/0012-  
880 1606(86)90062-X
- 881 Neufeld DA, Aulthouse AL. 1986. Association of mesenchyme with attenuated basement membranes  
882 during morphogenetic stages of newt limb regeneration. *The American Journal of Anatomy* 176.  
883 doi:https://doi.org/10.1002/aja.1001760404
- 884 Nguyen M, Singhal P, Piet J, Shefelbine SJ, Maden M, Voss RS, Monaghan JR. 2017. Retinoic acid  
885 receptor regulation of epimorphic and homeostatic regeneration in the axolotl. *Development*  
886 144:dev.139873. doi:10.1242/dev.139873
- 887 Oldenbourg R. 1996. A new view on polarization microscopy. *Nature* 381:811–812.  
888 doi:10.1038/381811a0
- 889 Pederson L, Ruan M, Westendorf JJ, Khosla S, Oursler MJ. 2008. Regulation of bone formation by  
890 osteoclasts involves Wnt/BMP signaling and the chemokine sphingosine-1-phosphate. *Proc*  
891 *National Acad Sci* 105:20764–20769. doi:10.1073/pnas.0805133106
- 892 Repesh LA, Oberpriller JC. 1978. Scanning electron microscopy of epidermal cell migration in wound  
893 healing during limb regeneration in the adult newt, *Notophthalmus viridescens*. *Am j anat*  
894 151:539–555. doi:https://doi.org/10.1002/aja.1001510408
- 895 Riquelme-Guzmán C, Schuez M, Böhm A, Knapp D, Edwards-Jorquera S, Ceccarelli AS, Chara O,  
896 Rauner M, Sandoval-Guzmán T. 2021. Postembryonic development and aging of the appendicular  
897 skeleton in *Ambystoma mexicanum*. *Dev Dynam*. doi:10.1002/dvdy.407
- 898 Rodgers AK, Smith JJ, Voss SR. 2020. Identification of immune and non-immune cells in  
899 regenerating axolotl limbs by single-cell sequencing. *Exp Cell Res* 394:112149.  
900 doi:10.1016/j.yexcr.2020.112149
- 901 Ryu J, Kim HJ, Chang E, Huang H, Banno Y, Kim H. 2006. Sphingosine 1-phosphate as a regulator of  
902 osteoclast differentiation and osteoclast–osteoblast coupling. *Embo J* 25:5840–5851.  
903 doi:10.1038/sj.emboj.7601430
- 904 Sandoval-Guzmán T, Currie JD. 2018. The journey of cells through regeneration. *Current opinion in*  
905 *cell biology* 55:36–41. doi:10.1016/j.ceb.2018.05.008

- 906 Schindelin J, Arganda-Carreras I, Frise E, Kaynig V, Longair M, Pietzsch T, Preibisch S, Rueden C,  
907 Saalfeld S, Schmid B, Tinevez J-Y, White DJ, Hartenstein V, Eliceiri K, Tomancak P, Cardona A.  
908 2012. Fiji: an open-source platform for biological-image analysis. *Nat Methods* 9:676–682.  
909 doi:10.1038/nmeth.2019
- 910 Seifert AW, Muneoka K. 2018. The blastema and epimorphic regeneration in mammals. *Dev Biol*  
911 433:190–199. doi:10.1016/j.ydbio.2017.08.007
- 912 Simkin J, Sammarco MC, Dawson LA, Tucker C, Taylor LJ, Meter K, Muneoka K. 2015. Epidermal  
913 closure regulates histolysis during mammalian (Mus) digit regeneration. *Regeneration (Oxford,*  
914 *England)* 2:106–19. doi:10.1002/reg2.34
- 915 Simkin J, Sammarco MC, Marrero L, Dawson LA, Yan M, Tucker C, Cammack A, Muneoka K. 2017.  
916 Macrophages are required to coordinate mouse digit tip regeneration. *Development (Cambridge,*  
917 *England)* 144:3907–3916. doi:10.1242/dev.150086
- 918 Stocum DL. 2017. Mechanisms of urodele limb regeneration. *Regen* 4:159–200. doi:10.1002/reg2.92
- 919 Tanaka EM. 2016. The Molecular and Cellular Choreography of Appendage Regeneration. *Cell*  
920 165:1598–1608. doi:10.1016/j.cell.2016.05.038
- 921 Tank PW, Carlson BM, Connelly TG. 1976. A staging system for forelimb regeneration in the axolotl,  
922 *Ambystoma mexicanum*. *Journal of morphology* 150:117–28. doi:10.1002/jmor.1051500106
- 923 Tassava RA, Garling DJ. 1979. Regenerative Responses in Larval Axolotl Limbs with Skin Grafts  
924 over the Amputation Surface. *J Exp Zool* 208:97–110. doi:https://doi.org/10.1002/jez.1402080111
- 925 Thompson S, Muzinic L, Muzinic C, Niemiller ML, Voss SR. 2014. Probability of regenerating a  
926 normal limb after bite injury in the Mexican axolotl (*Ambystoma mexicanum*). *Regen* 1:27–32.  
927 doi:10.1002/reg2.17
- 928 Thornton CS. 1957. The effect of apical cap removal on limb regeneration in *Amblystoma* larvae. *J*  
929 *Exp Zool* 134:357–381. doi:https://doi.org/10.1002/jez.1401340209
- 930 Thornton CS. 1938a. The histogenesis of muscle in the regenerating fore limb of larval *Amblystoma*  
931 *punctatum*. *J Morphol* 62:17–47. doi:10.1002/jmor.1050620104
- 932 Thornton CS. 1938b. The histogenesis of the regenerating fore limb of larval *Amblystoma* after  
933 exarticulation of the humerus. *J Morphol* 62:219–241. doi:10.1002/jmor.1050620204
- 934 Tsai S. 2020. Inhibition of Wound Epidermis Formation via Full Skin Flap Surgery During Axolotl  
935 Limb Regeneration. *J Vis Exp*. doi:10.3791/61522
- 936 Tsai SL, Baselga-Garriga C, Melton DA. 2020. Midkine is a dual regulator of wound epidermis  
937 development and inflammation during the initiation of limb regeneration. *Elife* 9:e50765.  
938 doi:10.7554/elife.50765
- 939 Tsai SL, Baselga-Garriga C, Melton DA. 2019. Blastemal progenitors modulate immune signaling  
940 during early limb regeneration. *Development* 146:dev169128. doi:10.1242/dev.169128
- 941 Tsutsumi R, Inoue T, Yamada S, Agata K. 2015. Reintegration of the regenerated and the remaining  
942 tissues during joint regeneration in the newt *Cynops pyrrhogaster*. *Regeneration* 2:26–36.  
943 doi:10.1002/reg2.28

- 944 Vinarsky V, Atkinson DL, Stevenson TJ, Keating MT, Odelberg SJ. 2005. Normal newt limb  
945 regeneration requires matrix metalloproteinase function. *Dev Biol* 279:86–98.  
946 doi:10.1016/j.ydbio.2004.12.003
- 947 Wickham H. 2016. ggplot2, Elegant Graphics for Data Analysis. *R*. doi:10.1007/978-3-319-24277-4
- 948 Wickham H. 2011. The Split-Apply-Combine Strategy for Data Analysis. *J Stat Softw* 40.  
949 doi:10.18637/jss.v040.i01
- 950 Wickham H, Averick M, Bryan J, Chang W, McGowan L, François R, Grolemund G, Hayes A, Henry  
951 L, Hester J, Kuhn M, Pedersen T, Miller E, Bache S, Müller K, Ooms J, Robinson D, Seidel D,  
952 Spinu V, Takahashi K, Vaughan D, Wilke C, Woo K, Yutani H. 2019. Welcome to the Tidyverse.  
953 *J Open Source Softw* 4:1686. doi:10.21105/joss.01686
- 954 Woltering JM, Vonk FJ, Müller H, Bardine N, Tuduze IL, Bakker MAG de, Knöchel W, Sirbu IO,  
955 Durston AJ, Richardson MK. 2009. Axial patterning in snakes and caecilians: Evidence for an  
956 alternative interpretation of the Hox code. *Dev Biol* 332:82–89. doi:10.1016/j.ydbio.2009.04.031
- 957 Xiong J, Onal M, Jilka RL, Weinstein RS, Manolagas SC, O’Brien CA. 2011. Matrix-embedded cells  
958 control osteoclast formation. *Nature Medicine* 17:1235–1241. doi:10.1038/nm.2448
- 959 Xuan W, Feng X, Qian C, Peng L, Shi Y, Xu L, Wang F, Tan W. 2017. Osteoclast differentiation gene  
960 expression profiling reveals chemokine CCL4 mediates RANKL-induced osteoclast migration and  
961 invasion via PI3K pathway. *Cell Biochem Funct* 35:171–177. doi:10.1002/cbf.3260
- 962 Yang EV, Byant SV. 1994. Developmental Regulation of a Matrix Metalloproteinase during  
963 Regeneration of Axolotl Appendages. *Dev Biol* 166:696–703. doi:10.1006/dbio.1994.1348
- 964 Yang EV, Gardiner DM, Carlson MRJ, Nugas CA, Bryant SV. 1999. Expression of Mmp-9 and  
965 related matrix metalloproteinase genes during axolotl limb regeneration. *Dev Dynam* 216:2–9.  
966 doi:10.1002/(sici)1097-0177(199909)216:1<2::aid-dvdy2>3.0.co;2-p
- 967

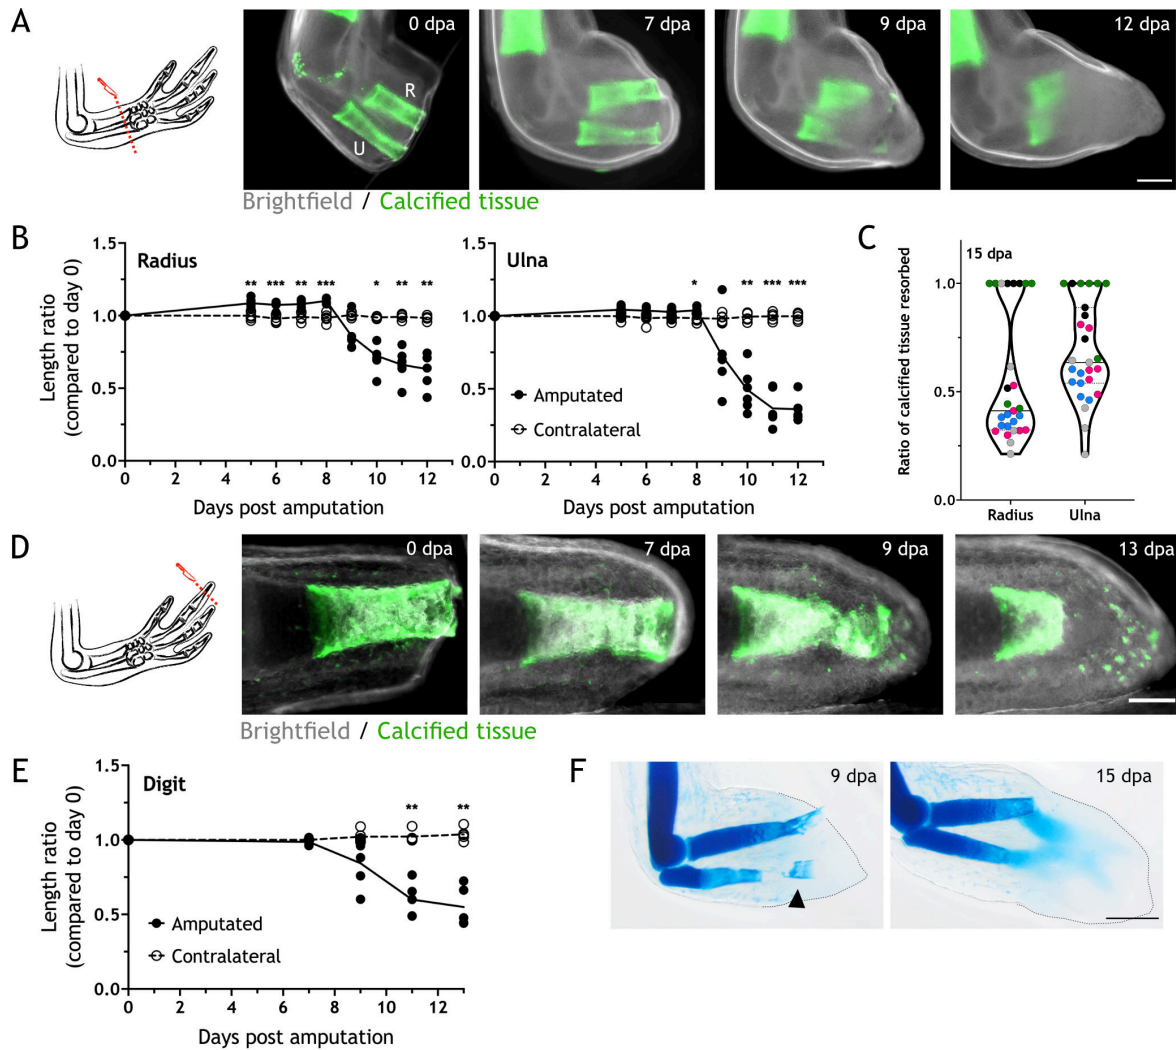

968

969 **Figure 1: Skeletal elements are resorbed upon amputation.**

970 (A) Time course of resorption during zeugopod regeneration. Calcein-stained axolotls were amputated  
 971 at the distal end of the calcified tissue (n = 6, five independent experiments). R = radius. U = ulna Scale  
 972 bar: 500  $\mu$ m.

973 (B) Quantification of resorption rate in radius and ulna. Length ratio was calculated using the length at  
 974 0 dpa as a reference. Each dot represents an animal (n = 6. \*\*\* p < 0.001, \*\* p < 0.01, \* p < 0.05,  
 975 Bonferroni's multiple comparisons test, amputated versus contralateral).

976 (C) Quantification of resorption percentage in calcified radius and ulna among animals in different  
 977 assays. Each assay is represented by a color (n = 27, five independent experiments).

978 (D) Time course of resorption during digit regeneration. Calcein-stained axolotls were amputated at the  
 979 distal end of the calcified tissue (n = 5). Scale bar: 200  $\mu$ m.

980 (E) Quantification of calcified digit resorption. Length ratio was calculated using the length at 0 dpa as  
 981 a reference. Each dot represents an animal (n = 5. \*\* p < 0.01, Bonferroni's multiple comparisons test,  
 982 amputated versus contralateral).

983 (F) Alcian blue staining of limbs at different dpa (n = 2). Arrowhead: broken piece of ulna. Dashed line:  
 984 outline of distal limb. Scale bar: 500  $\mu$ m.

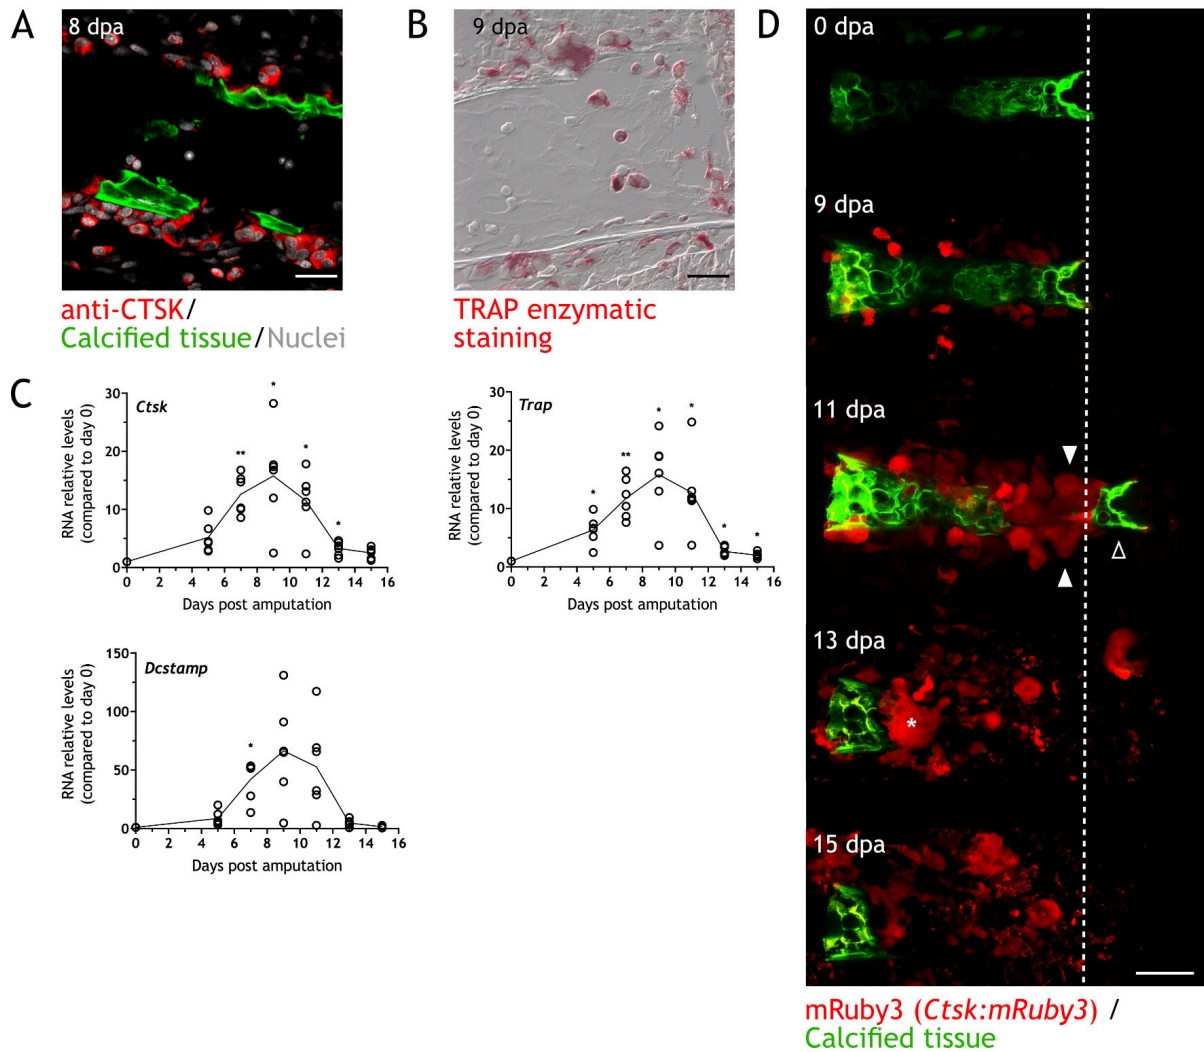

985

986 **Figure 2: Osteoclasts are identified during skeletal resorption.**

987 (A) Apotome image of IF for anti-CTSK (red) in zeugopod section at 8 dpa (n = 2). Calcein was used  
988 for calcified cartilage labelling (green) and Hoechst for nuclear staining (white). Scale bar: 50  $\mu$ m.

989 (B) TRAP enzymatic staining in zeugopod section at 9 dpa (n = 2). Scale bar: 50  $\mu$ m.

990 (C) RT-qPCR for *Trap*, *Ctsk* and *Dcstamp* at different dpa upon zeugopodial amputation. Solid line  
991 represents mean, each dot is an animal (n = 6. \*\* p < 0.01, \* p < 0.05, Bonferroni's multiple comparisons  
992 test, each time point versus 0 dpa).

993 (D) *In vivo* confocal imaging of *Ctsk:mRuby3* (red) upon digit amputation (n = 3, two independent  
994 experiments). Calcein was used for calcified cartilage labelling (green). Image represent a maximum  
995 intensity projection of 10 images (3  $\mu$ m interval). White arrowhead: mRuby3<sup>+</sup> cells (osteoclasts). Black  
996 arrowhead: break in the skeletal tissue. Dashed line: amputation plane. Asterisk: Multinucleated  
997 osteoclast. Scale bar: 100  $\mu$ m.



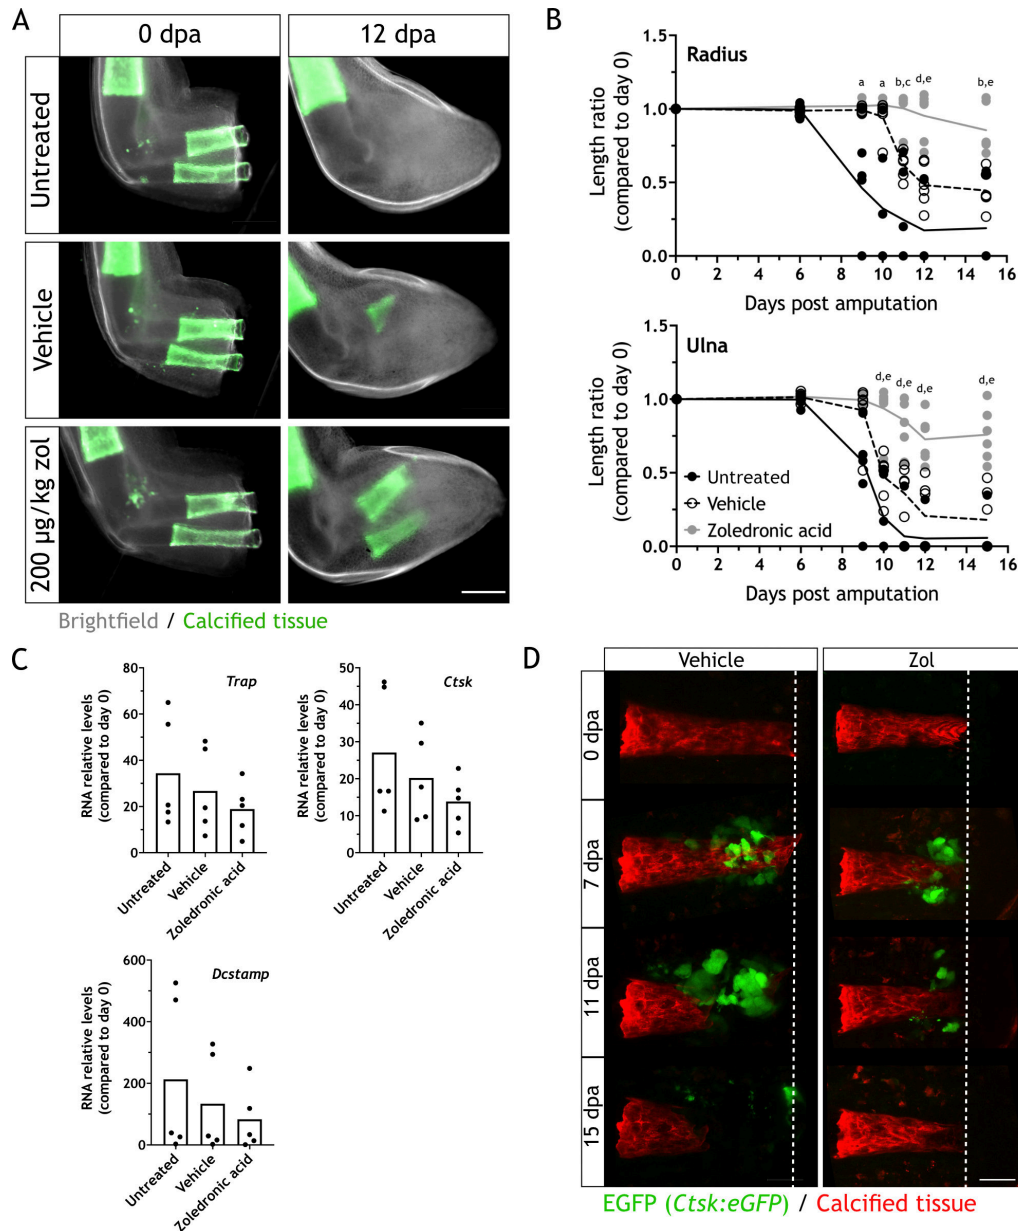

998

999 **Figure 3: Zoledronic acid treatment inhibits osteoclast-mediated skeletal resorption.**

1000 (A) Time course of resorption during zeugopod regeneration upon zoledronic acid treatment (zol) (n =  
1001 6, three independent experiments). Calcein-stained axolotls were amputated at the distal end of the  
1002 calcified tissue. Scale bar: 500 µm.

1003 (B) Quantification of resorption rate in radius and ulna upon zol treatment. Length ratio was calculated  
1004 using the length at 0 dpa as a reference. Each dot represents an animal (n = 6. a: p < 0.05 uninjected vs.  
1005 zol, b: p < 0.01 uninjected vs. zol, c: p < 0.001 vehicle vs. zol, d: p < 0.001 uninjected vs. zol, e: p <  
1006 0.01 vehicle vs. zol, Tukey's multiple comparisons test).

1007 (C) RT-qPCR for *Trap*, *Ctsk* and *Dcstamp* at 9 dpa upon zol treatment. Each dot represents an animal  
1008 (n = 5, Tukey's multiple comparisons test).

1009 (D) *In vivo* confocal imaging of *Ctsk:eGFP* (green) upon digit amputation (n = 4, two independent  
1010 experiments). Alizarin red was used for calcified cartilage labelling (red). Image represent a maximum  
1011 intensity projection of 15 images (3 µm interval). Scale bar: 50 µm.

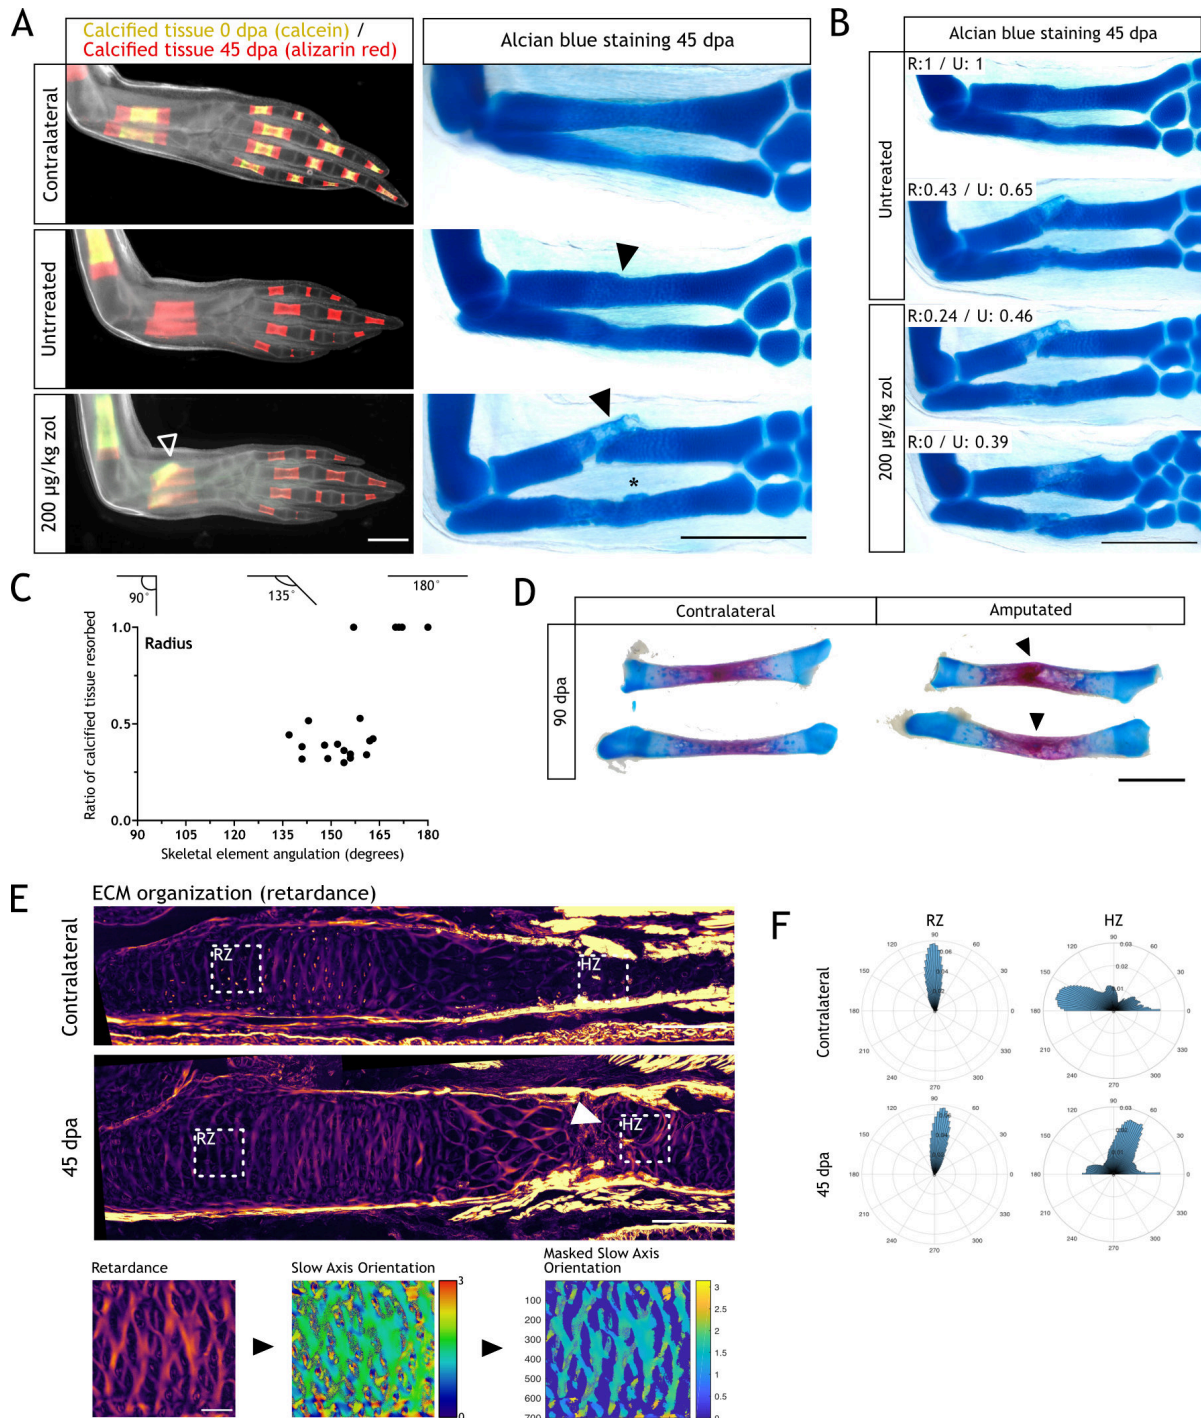

1012

1013 **Figure 4: Resorption inhibition does not halt regeneration but results in an integration failure of**  
 1014 **the newly formed skeleton.**

1015 (A) *In vivo* calcein / alizarin red staining (left panel) and alcian blue staining (right panel) in zol treated  
 1016 limbs at 45 dpa (n = 6). Arrowheads: integration failure in skeletal elements. Asterisk: heterotopic  
 1017 cartilage formation in ulna. Scale bar: 1 mm.

1018 (B) Alcian blue staining in zol treated limbs at 45 dpa (n = 6). Resorption rate for radius and ulna is  
 1019 specified for each case. Scale bar: 1 mm.

1020 (C) Quantification of angulation at the stump-regenerated interphase in untreated radii at 45 dpa.  
 1021 Angulation schematic is shown on top of the graph (n = 22, 4 independent experiments).

1022 (D) Alcian blue/alizarin red staining of zeugopodial elements at 90 dpa. Arrowhead: stump-regenerated  
1023 interphase. Scale bar: 2 mm.

1024 (E) Upper panel: retardance image from unamputated and 40 dpa ulna. RZ (resting zone) and HZ  
1025 (hypertrophic zone) squares represent the quantification areas ( $n = 7$  for unamputated,  $n = 9$  for  
1026 amputated). Arrowhead: disorganized interphase. Scale bar: 200  $\mu\text{m}$ . Lower panel: quantification flow  
1027 chart. The mask was created using the retardance image to quantify only ECM components, and applied  
1028 to the slow axis orientation image to determine the orientation of the ECM components at each pixel. In  
1029 the masked orientational field, the cellular regions are shown in dark blue for visualization purposes but  
1030 their orientational values were excluded from the analysis in F. Scale bar: 50  $\mu\text{m}$ .

1031 (F) Histograms showing the orientation of the ECM components at each pixel in RZ or HZ for the  
1032 unamputated or 40 dpa ulna ( $n = 7$  for unamputated,  $n = 9$  for amputated). Angles are shown in degrees.

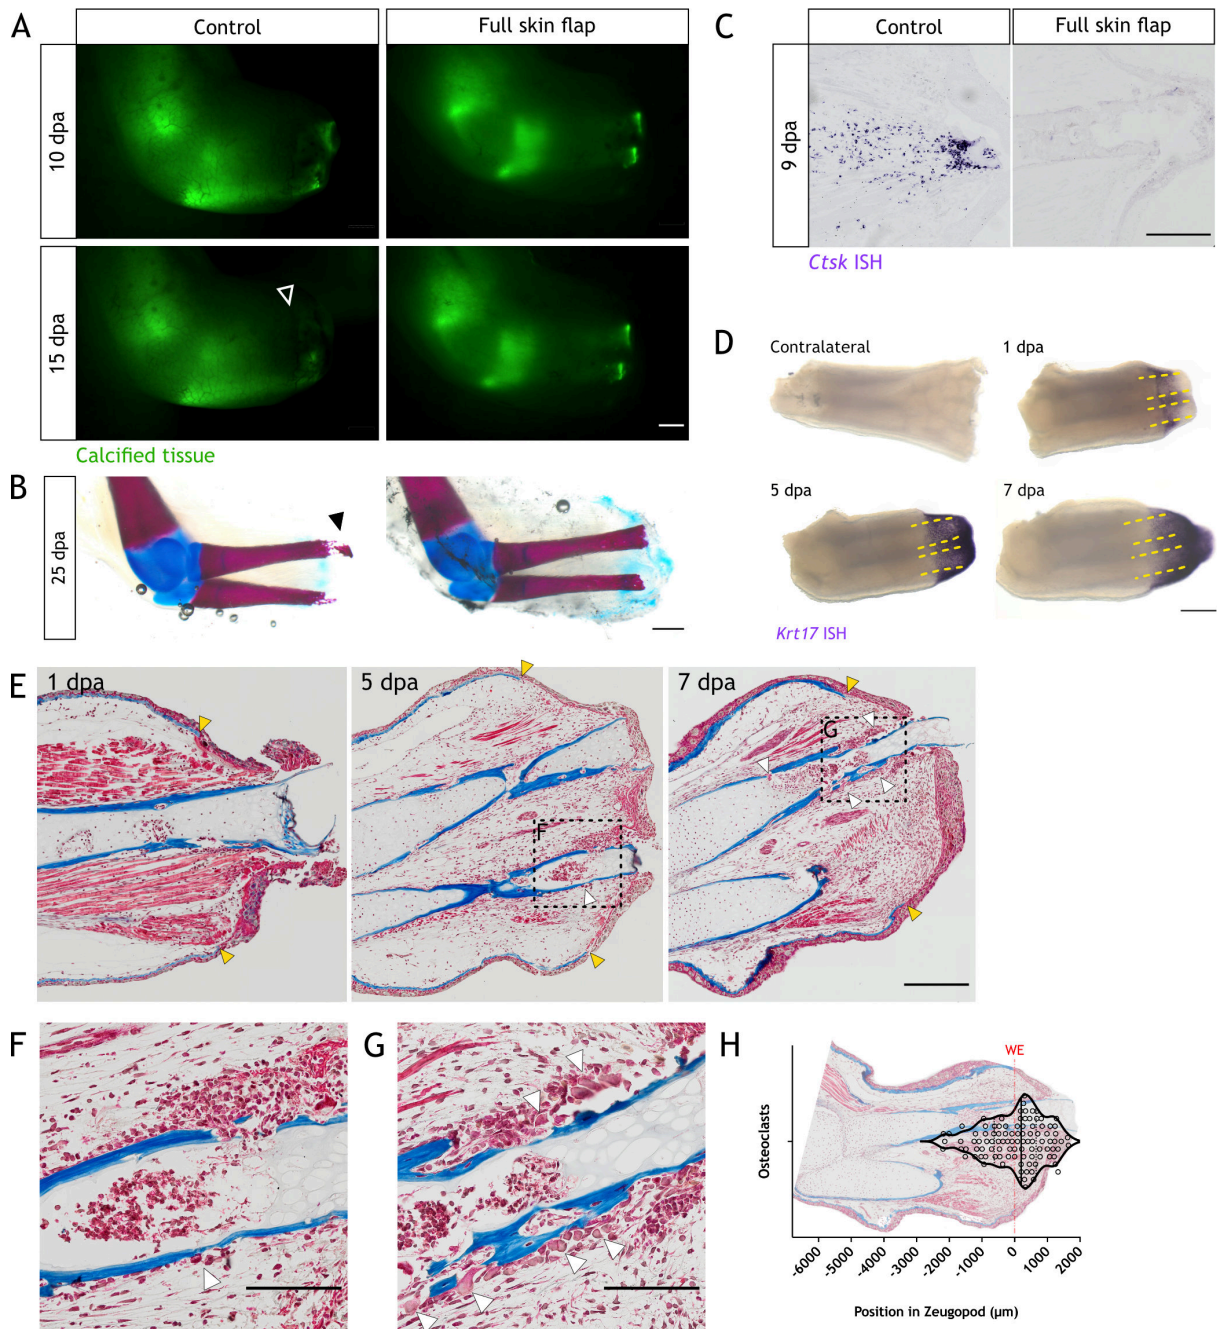

1033

1034 **Figure 5: The wound epithelium is involved in resorption induction.**

1035 (A) Time course of resorption during zeugopod regeneration upon full skin flap surgery (n = 9). Calcein-  
 1036 stained axolotls were amputated at the distal end of the calcified tissue. Arrowheads: resorption in  
 1037 control cases. Scale bar: 1 mm.

1038 (B) Alcian blue/alizarin red staining of limbs at 25 dpa after full skin flap surgery (n = 9). Arrowhead:  
 1039 resorption of distal radius. Scale bar: 1 mm.

1040 (C) ISH for *Ctsk* in limb sections at 9 dpa after full skin flap surgery (n = 3 for control, n = 4 for FSF).  
 1041 Scale bar: 500 μm.

1042 (D) WISH for *Krt17* in limbs upon zeugopod amputation at different dpa (n = 3). Dashed lines: skeletal  
 1043 elements position. Scale bar: 500 μm.

- 1044 (E) Masson's trichrome staining from limb sections upon zeugopod amputation at different dpa (n = 3).  
1045 Yellow arrowheads: beginning of wound epithelium. White arrowheads: osteoclasts.  
1046 (F) Inset from (E) 5 dpa. Scale bar: 200  $\mu$ m.  
1047 (G) Inset from (E) 7dpa. White arrowheads: osteoclasts. Scale bar: 200  $\mu$ m.  
1048 (H) Quantification of position of osteoclasts in zeugopod at 7 dpa. Each dot represents an osteoclast.  
1049 Position of WE is shown with a red line. Image of a quantified section shows the position of osteoclasts  
1050 in the sample (n = 101, 3 independent experiments).

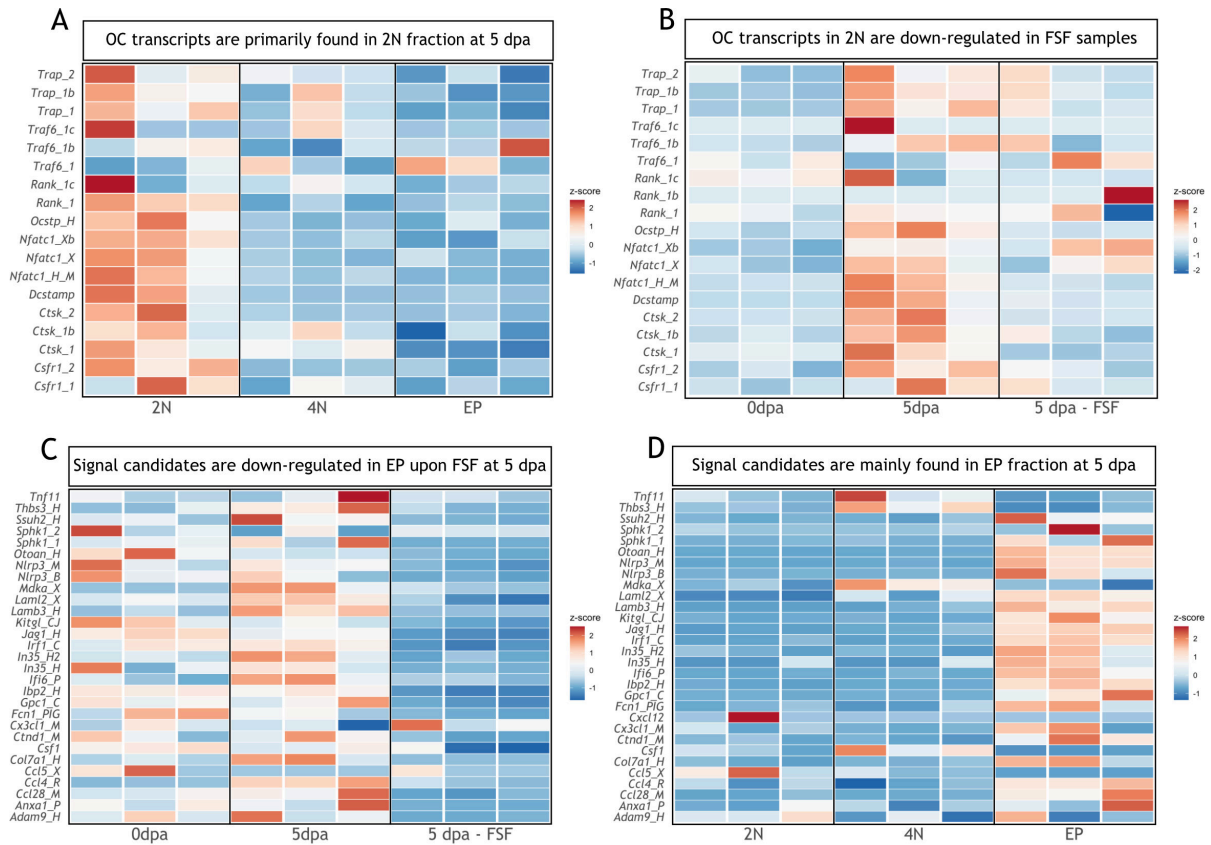

1051

1052 **Figure 6: Transcripts associated with osteoclastogenesis are downregulated in FSF samples at 5**  
 1053 **dpa.**

1054 (A) Heatmap of transcripts associated with osteoclast function in three different fractions at 5 dpa (n =  
 1055 3). 2N: mature cells, 4N: dividing cells, EP: epithelial cells.

1056 (B) Heatmap of transcripts associated with osteoclast function in 2N fraction at different time points (n  
 1057 = 3). FSF sample correspond at 5 dpa.

1058 (C) Heatmap of differentially down-regulated transcripts in EP fraction after FSF surgery at 5 dpa  
 1059 associated with osteoclast recruitment and/or differentiation (n = 3).

1060 (D) Heatmap of differentially down-regulated transcripts after FSF surgery in three different fractions  
 1061 associated with osteoclast recruitment and/or differentiation (n = 3).

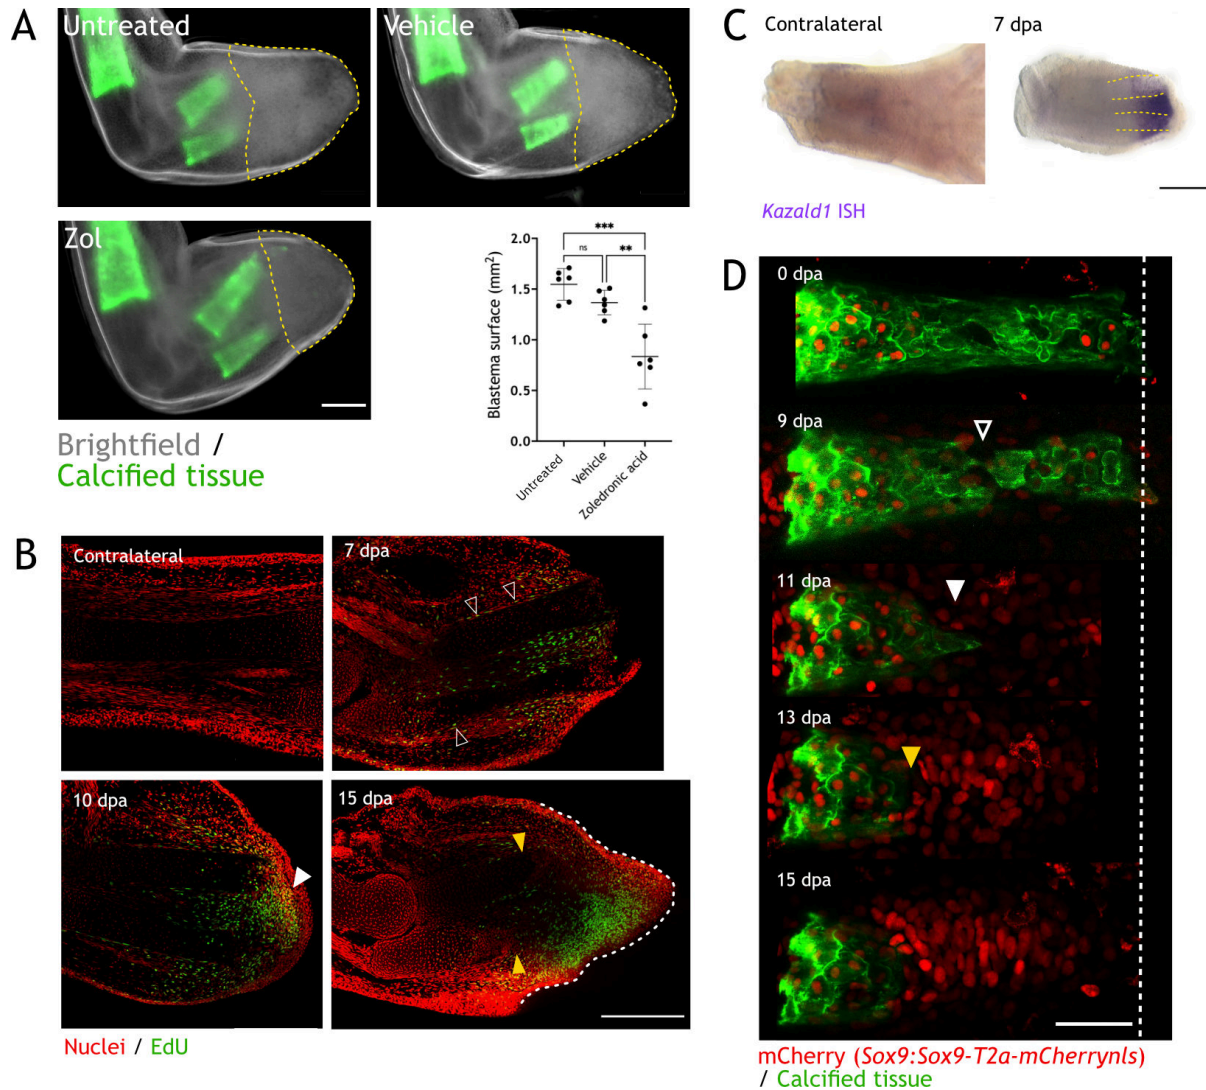

1062

1063 **Figure 7: Skeletal resorption and blastema formation are spatially and temporally correlated.**

1064 (A) Quantification of blastema size in zol treated limbs at 15 dpa. Dashed lines: blastema. Each dot  
1065 represents an animal (n = 6, \*\*\* p < 0.001, \*\* p < 0.01, Tukey's multiple comparisons test).

1066 (B) Whole mount EdU staining (green) in limbs upon zeugopod amputation at different dpa (n = 6). TO-  
1067 PRO-3 was used for nuclear staining (red). Black arrowheads: dividing periskeletal cells. White  
1068 arrowhead: blastema. Yellow arrowheads: distal end of skeletal element. Dashed line: blastema. Scale  
1069 bar: 500 μm.

1070 (C) WISH for *Kazald1* in limbs upon zeugopod amputation at 7 dpa (n = 2). Yellow dashed lines:  
1071 skeletal elements position. Scale bar: 500 μm.

1072 (D) Time course of resorption during digit regeneration in *Sox9-mCherry* (red) (n = 6). Calcein-stained  
1073 (green) axolotls were amputated at the distal end of the calcified tissue. Black arrowhead: calcified tissue  
1074 break. White arrowhead: condensation of mCherry<sup>+</sup> cells. Yellow arrowhead: resorption. Scale bar: 100  
1075 μm.

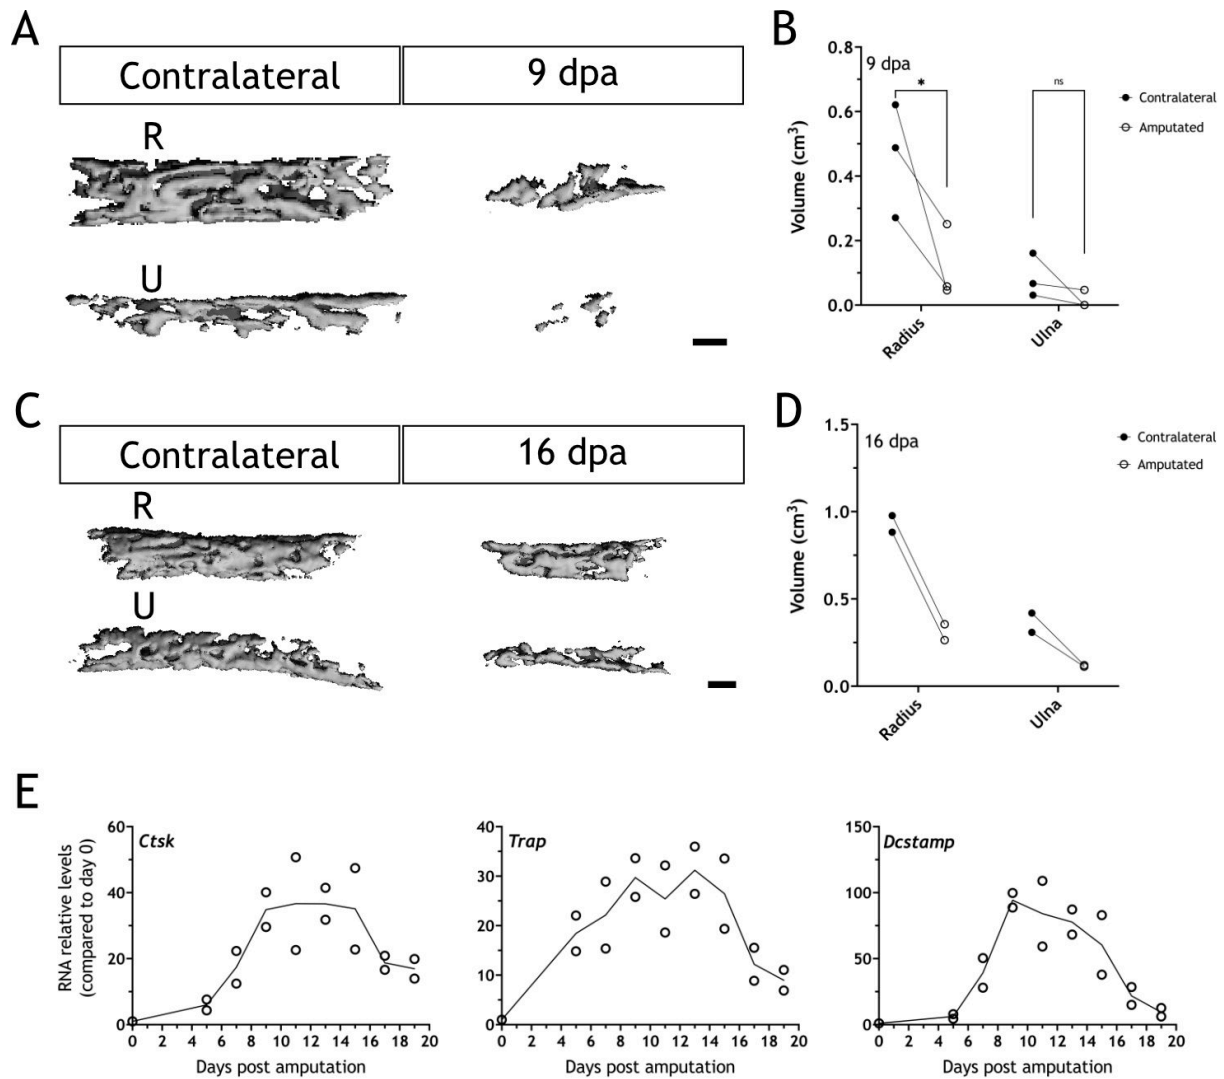

1076

1077 **Figure S1: Bones are resorbed upon amputation in 16 cm ST axolotls**

1078 (A) 3D reconstructions from  $\mu$ CT scans for radius (R) and ulna (U) in the contralateral and a 9 dpa limb  
 1079 upon amputation at the distal end of the calcified tissue (n = 3). Scale bar: 200  $\mu$ m.

1080 (B) Quantification of bones volume (cm<sup>3</sup>) for samples in (A). Each dot represents an animal (n = 3. \* p  
 1081 < 0.05, Bonferroni's multiple comparisons test, contralateral versus amputated).

1082 (C) 3D reconstructions from  $\mu$ CT scans for radius and ulna in the contralateral and a 16 dpa limb upon  
 1083 amputation at the distal end of the calcified tissue (n = 2). Scale bar: 200  $\mu$ m.

1084 (D) Quantification of bones volume (cm<sup>3</sup>) for samples in (C). Each dot represents an animal (n = 2).

1085 (E) RT-qPCR for *Ctsk*, *Trap* and *Dcstamp* at different dpa upon zeugopodial amputation. Solid line  
 1086 represents mean, each dot is an animal (n = 2).
